# Supplementary material
Source: MDPI journal article supplement (https://www.mdpi.com/2411-5134/3/1/11)

**Supplementary protocol for article :**

**A Simple Setup to Perform 3D Locomotion Tracking in Zebrafish by Using a Single Camera**

Gilbert Audira <sup>1</sup>, Bonifasius Putera Sampurna <sup>1</sup>, Stevhen Juniardi <sup>1</sup>,  
Sung-Tzu Liang <sup>1</sup>, Yu-Heng Lai <sup>2,#</sup> and Chung-Der Hsiao <sup>1,3,4 #</sup>

1. Department of Bioscience Technology, Chung Yuan Christian University, Chung-Li, Taiwan
2. Department of Chemistry, Chinese Culture University, Taipei, Taiwan
3. Center of Nanotechnology, Chung Yuan Christian University, Chung-Li, Taiwan
4. Center of Biomedical Technology, Chung Yuan Christian University, Chung-Li, Taiwan

Address correspondence to:

Yu-Heng Lai,

Department of Chemistry, Chinese Culture University, 11114 Taipei, Taiwan, Email: [lyh21@ulive.pccu.edu.tw](mailto:lyh21@ulive.pccu.edu.tw)

Chung-Der Hsiao,

Department of Bioscience Technology, Chung Yuan Christian University, 32023 Chung-Li Taiwan, E-mail: [cdhsiao@cycu.edu.tw](mailto:cdhsiao@cycu.edu.tw)

# Required Programs summarized

- Matlab Compiler Runtime

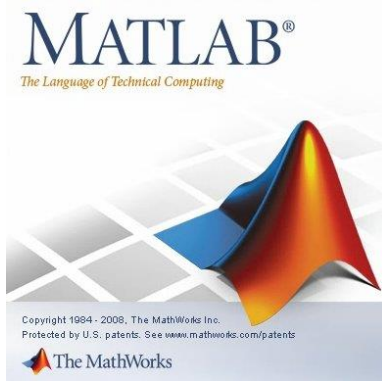

- ImageJ

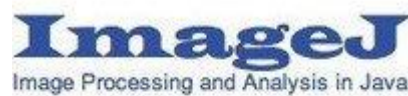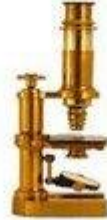

- EOS Utility

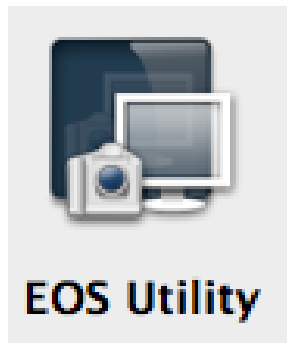

- Origin 9.1

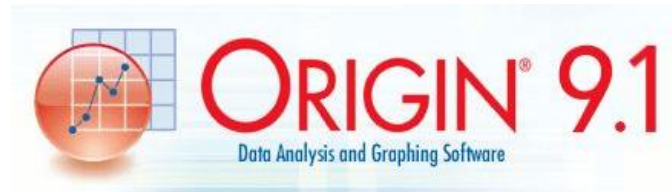

- idTracker

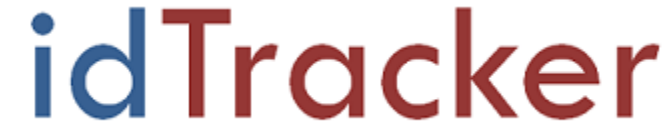

- Microsoft Excel

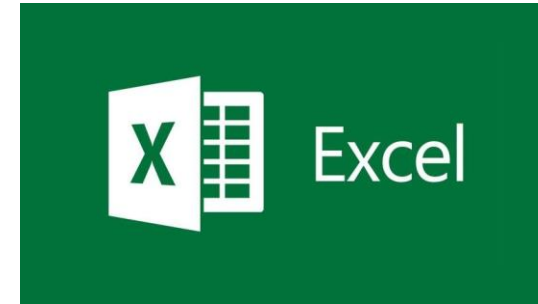

- GraphPad Prism

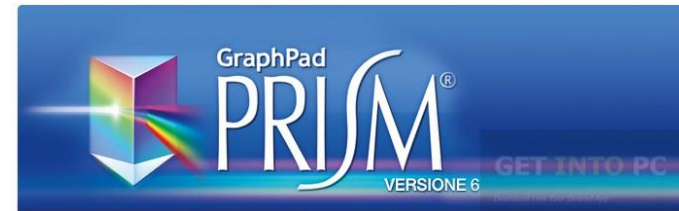

# Summary of analysis pipeline

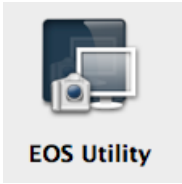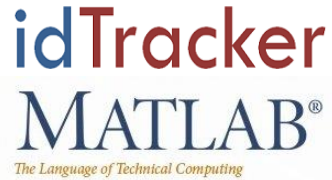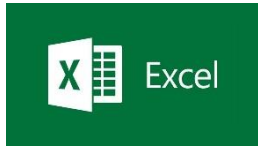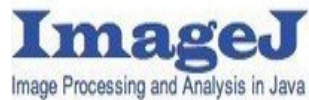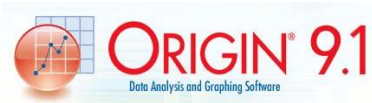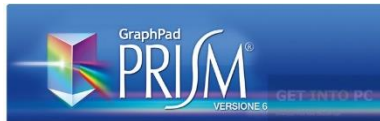

Video recording for **5 min@50fps** by a single camera (Canon 600D)

Use **idTracker** to track fish movement

Output fish xyz position pixel data in **excel format**

Convert xyz pixel data into cm by using **ImageJ** software

Establish 3D swimming trajectory by using **Oringin9.1** software

Perform statistic analysis by using **GraphPad Prism** software

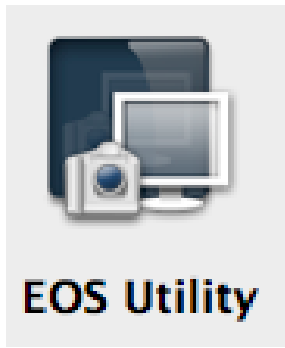

# Tips for Video Recording

- Frame rate per second (fps)
  - ↑ : **more accurate tracking, slower process**
  - ↓ : less accurate tracking, faster process
- Use a **good contrast** vessel for the fishes
- Using **Black and White image** setting is recommended because it can enhance the image contrast
- There must be free space in the disk of your computer because high resolution and high frame rate recording will generate a large amount of data
- Internal hard drive's video usage is strongly recommended

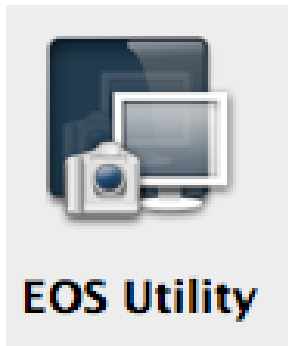

# Example video recorded by Canon 600D camera

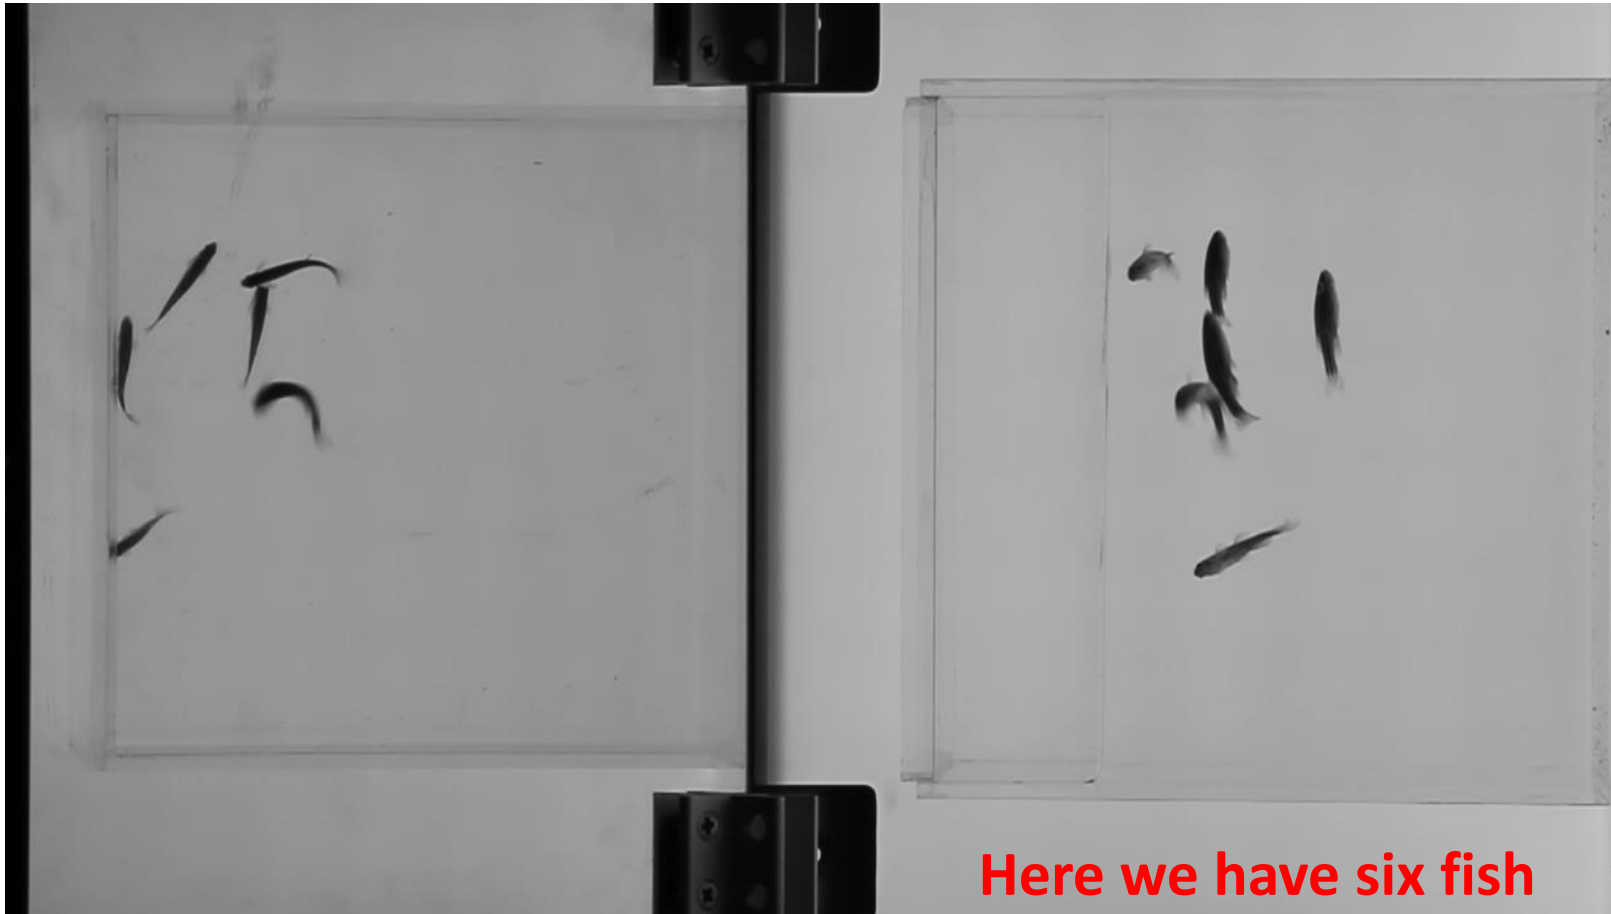

1280x720; 50fps

\*original video is available upon request

# idTracker Parameters adjustments for idTracker

Execute idTracker.exe

Select the file with the video

Load the video

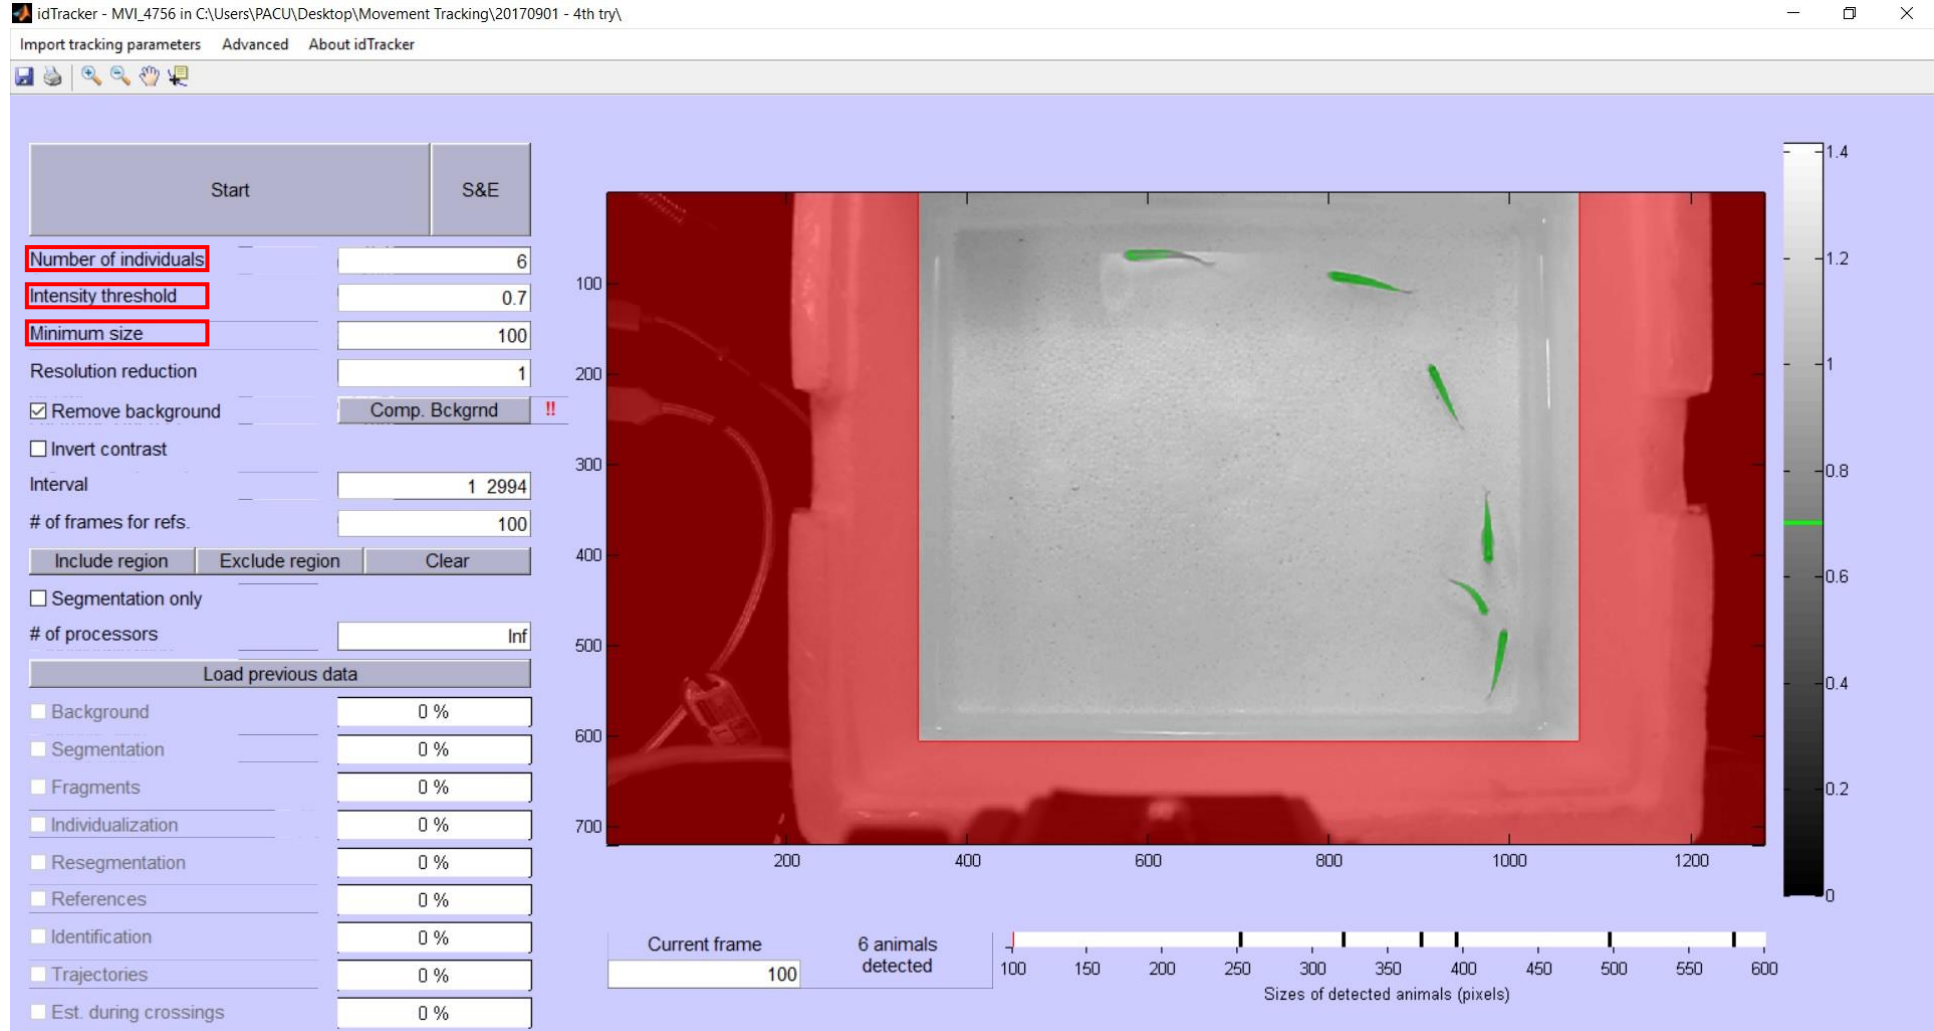

1. Enter the **number of individuals**

2. Intensity threshold

- The system is going to considers that pixels with lower intensity than this threshold belong to the animals (*vice versa* if “invert contrast” is checked)

3. Minimum size

- The programs will reject blobs smaller than the minimum size entered

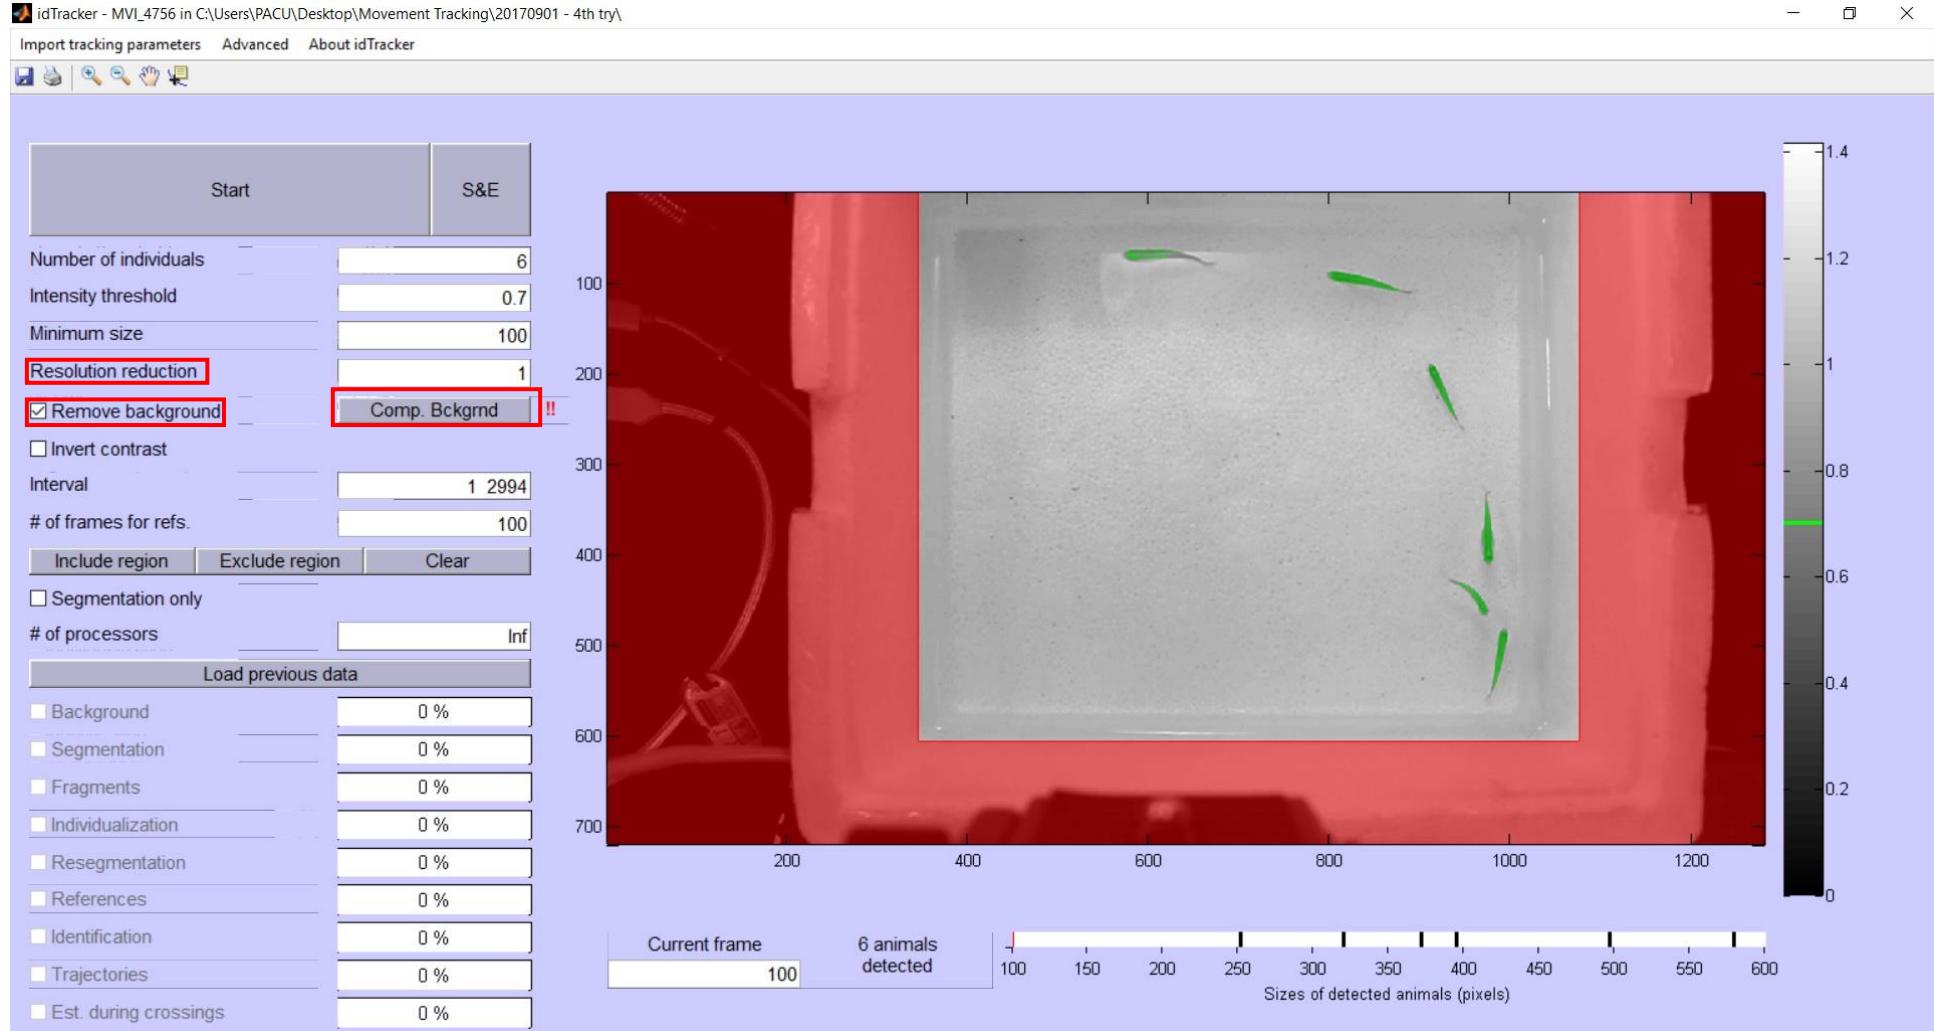

#### 4. Choose resolution reduction

- If the sizes of the animals are bigger than 2000 pixels, input a number higher than 1 (the number of pixels will be divided by  $n^2$ , where  $n$  is the number in the box)

#### 5. Background removal option

- Check if you want to activate the background removal option
- To compute it before, click on the 'Compute Bckgrnd' button



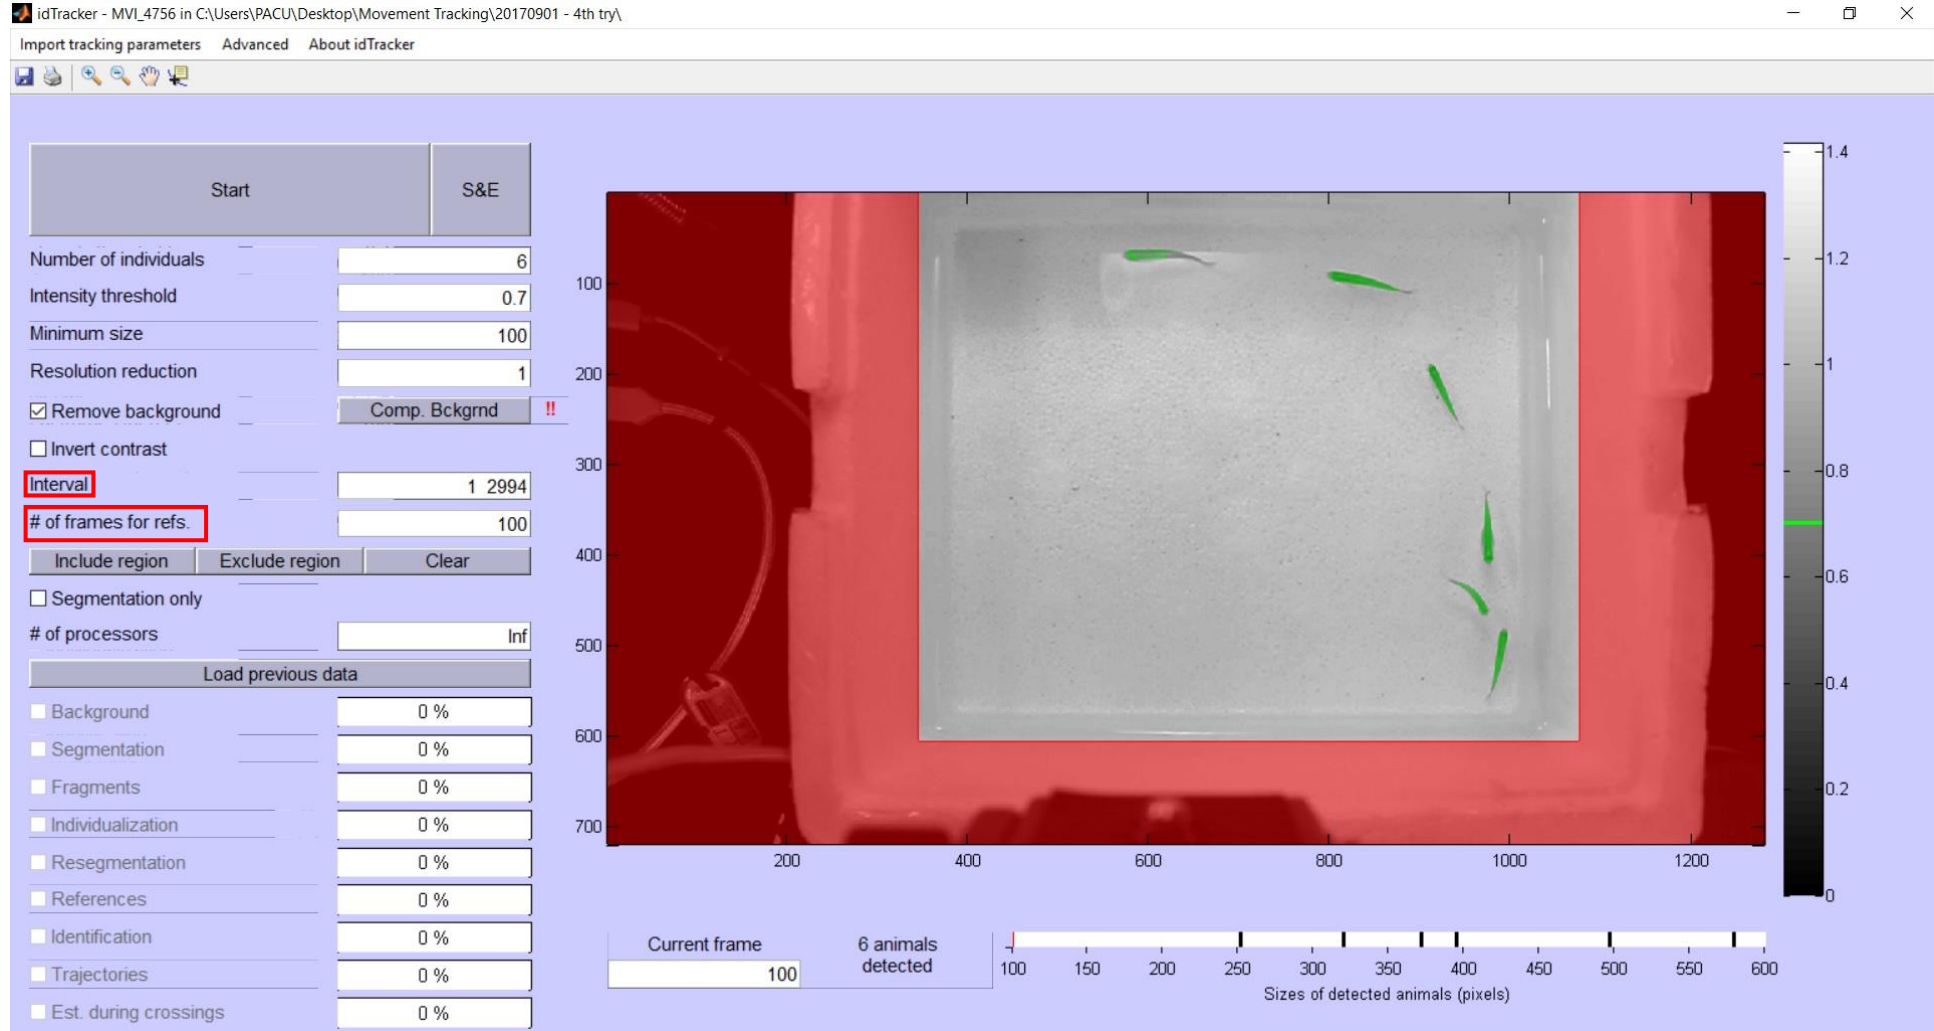

## 6. Choose an interval

- If you want to track only part of video, enter the interval that you want to track

## 7. Number of references frames

- Choose a lower number for increased speed, a higher number for increased accuracy

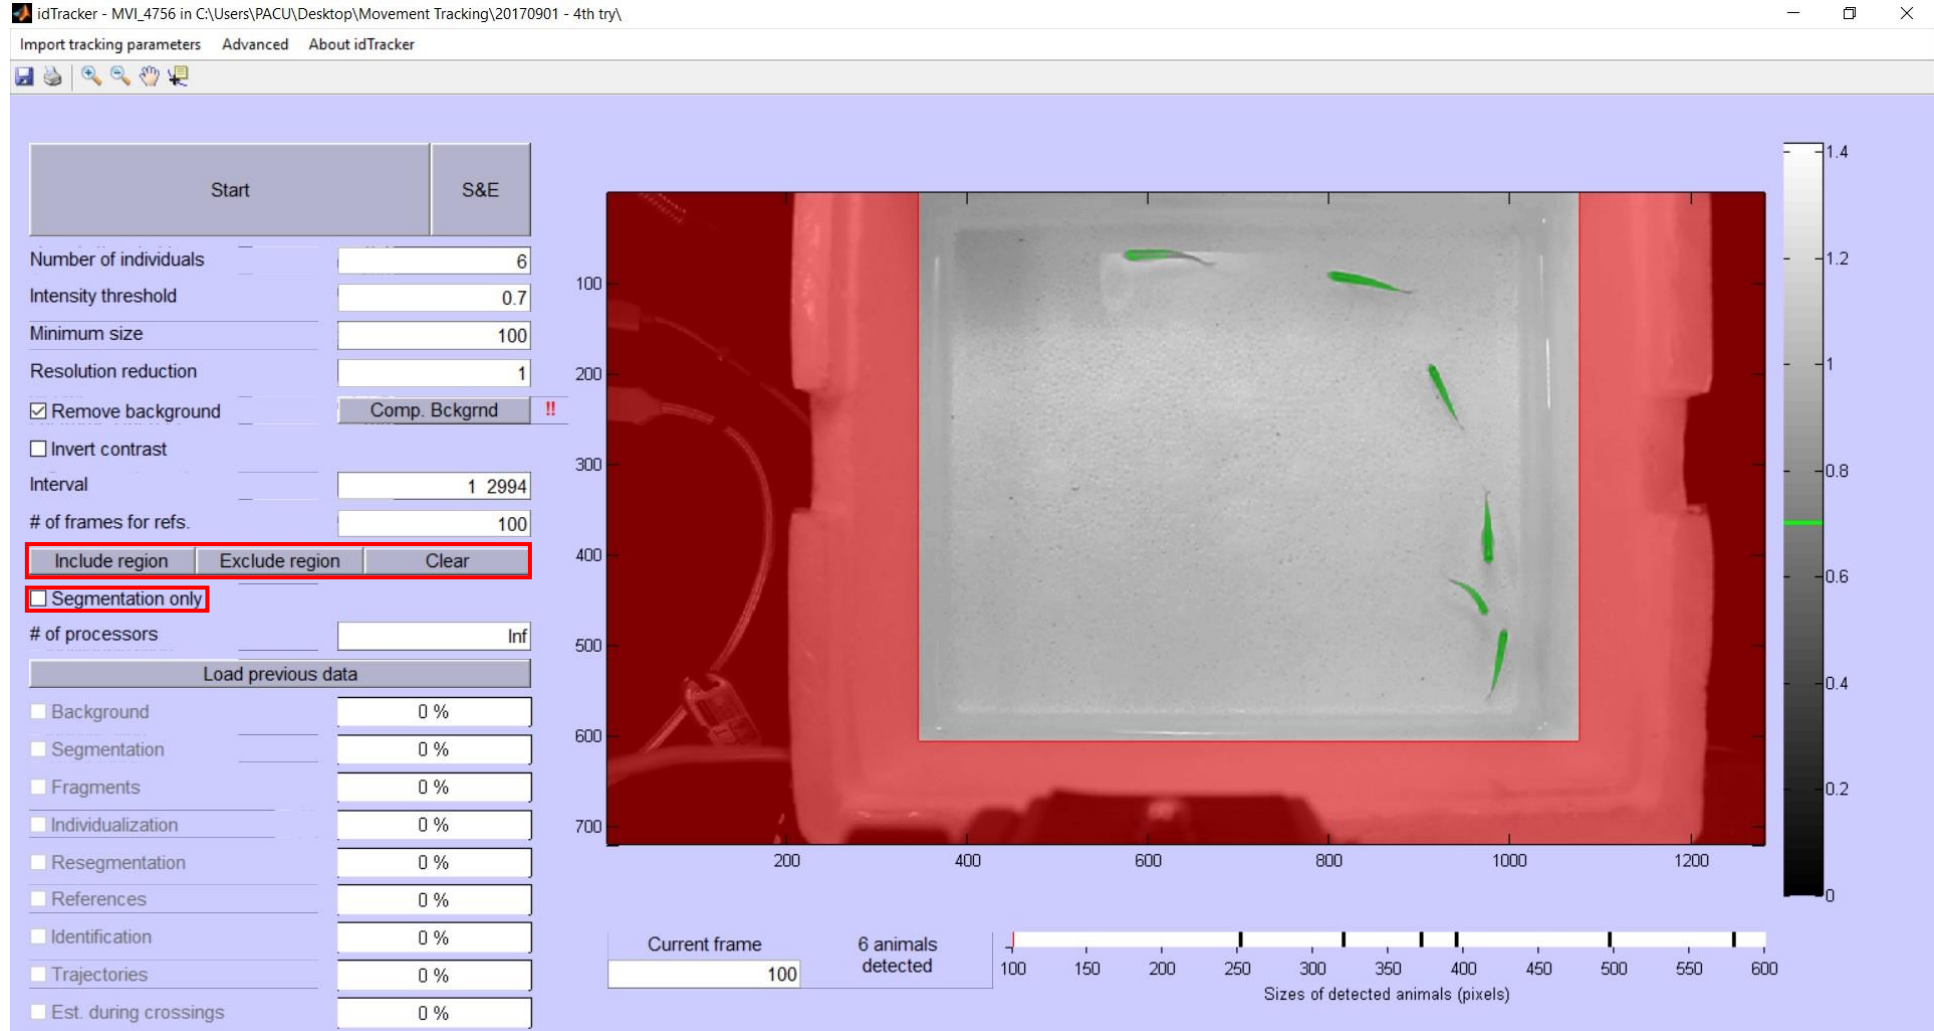

## 8. Select Region Of Interest (ROI) and/or exclude regions

- Click on button 'Clear' to clear all previously defined ROS's or excluded regions

## 9. Segmentation only

- If this box is checked, idTracker will exit after the segmentation step, leaving the tracking unfinished.
- The data can be recovered later using button 'Load Previous Data'

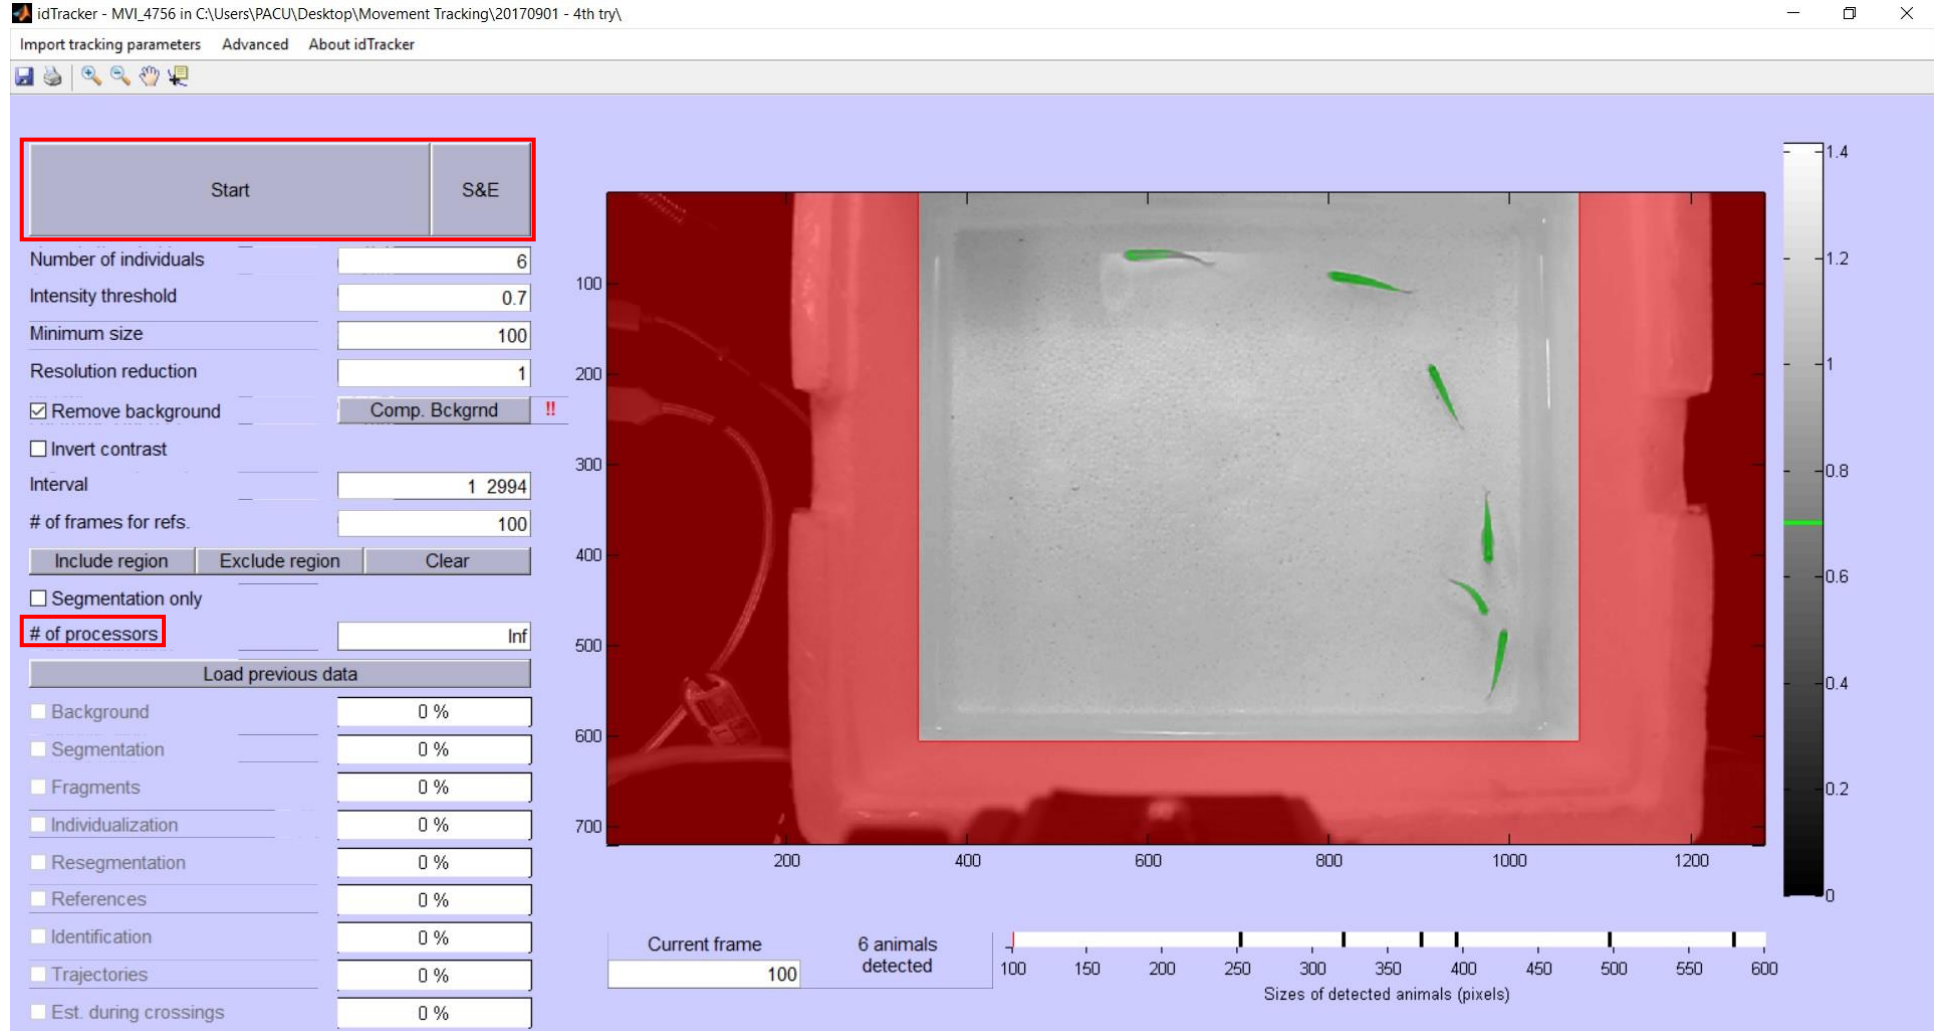

## 10. Number of processors

- The number of this box indicates how many processors idTracker will use ('Inf' means that idTracker will use all available processors)

## 11. Start tracking

- Click the 'Start' button
- If 'S&E' (Save & Exit) button pressed, the program ends, but the tracking does not start. All tracking parameters can be used later using 'Load Previous Data' button

# Movement Tracking

- **Separated** tracking is **better**
- Advantages
  - **Reduce** error occurrence
  - Easy to **match** the fish with their number
- Disadvantages
  - Tracking **duration** will take **more** time

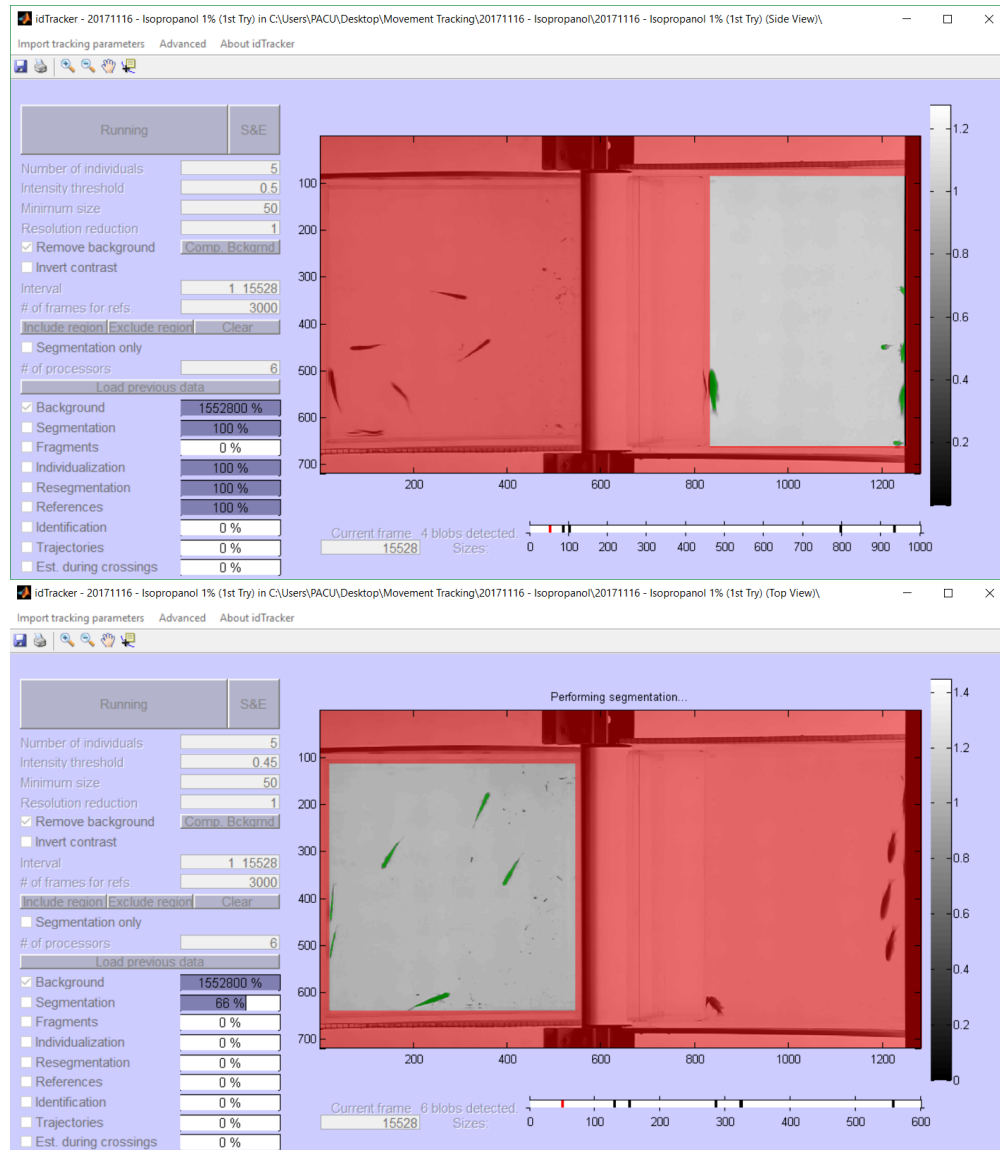

# Save side view and top view movement tracking separated

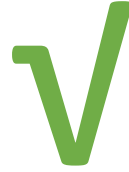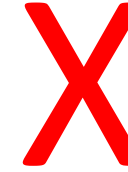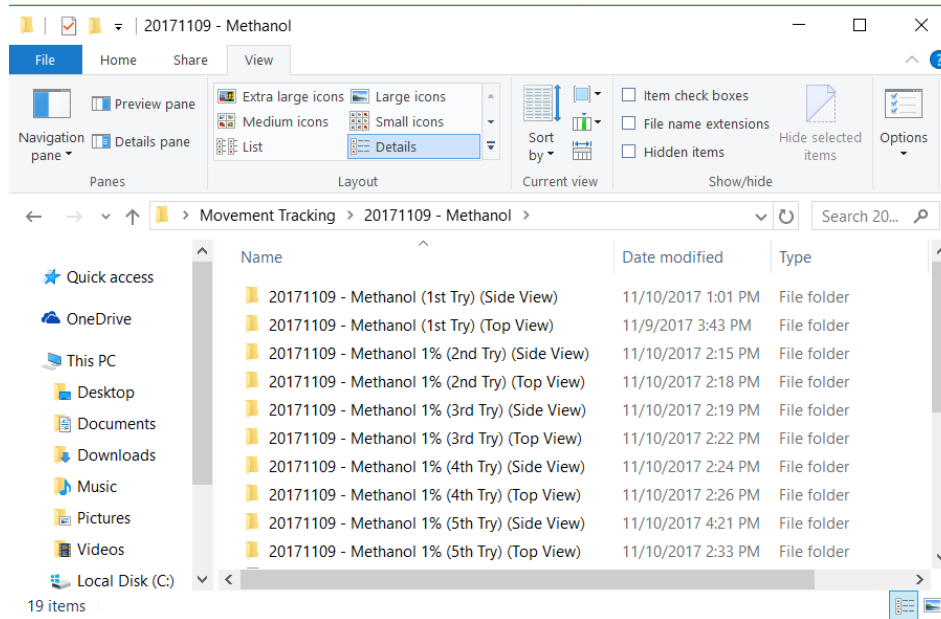

- Advantages
  - **Reduce** error occurrence
  - Easier to **maintain** the trajectories files
- Disadvantages
  - Need **more space** to store the video

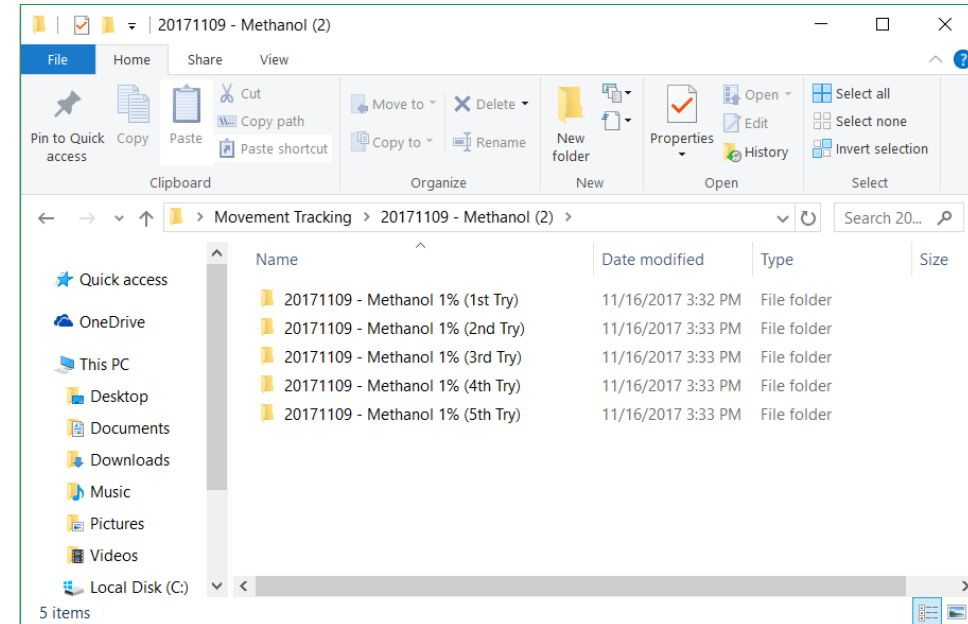

- Advantages
  - Just **one** video needs to be saved
- Disadvantages
  - Must **backup** the trajectories and video result file **before** continue to the 2<sup>nd</sup> tracking
  - Error **often** occurred



# Analysis results of idTracker

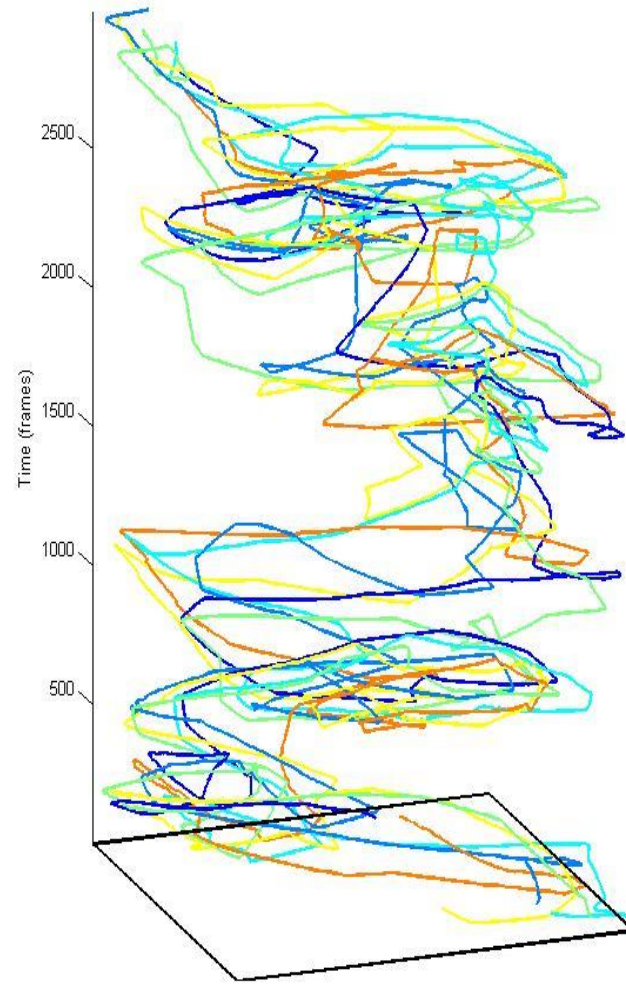

Tracking finished! :-)

Reliability of identities:

High (97 %)

The results are in the files named 'trajectories' in the same folder as the video.

About the output files

See results

Exit

- The results are in a folder called '**segm**' located in the same folder as the video
- Press 'About the output files' for more information about the results
- 'See results' button will play the result's video

# Analysis result of idTracker

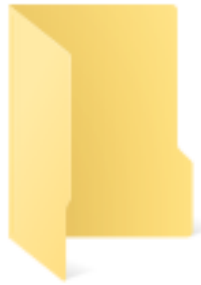

segm

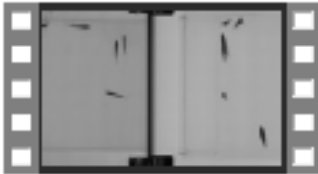

20171023 - 3D  
Male WT

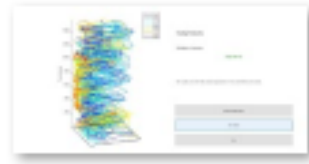

Result 1

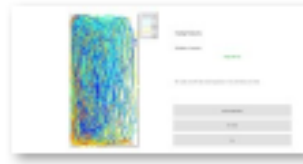

Result 2

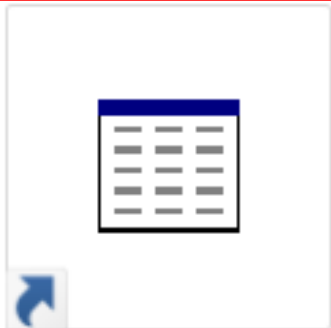

trajectories

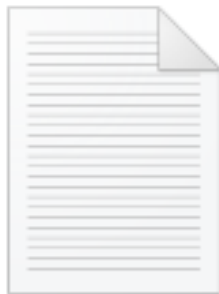

trajectories

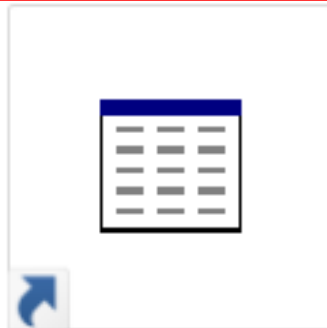

trajectories\_noga  
ps

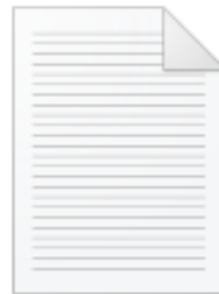

trajectories\_noga  
ps

- There will be four output files
  - Two of them are .mat files, to be loaded into Matlab
  - The others two are .txt files to import the data into any data analysis software
- Both of the files contain identical information, which is the following
  - X and Y coordinates of each individual in each frame
  - Probability of correct assignment

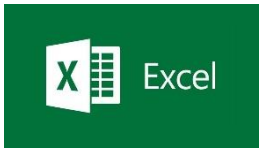

# Copy XY position information and paste to Excel

|    | A      | B      | C       | D      | E      | F       | G      | H      | I       | J      | K      |    |
|----|--------|--------|---------|--------|--------|---------|--------|--------|---------|--------|--------|----|
| 1  | X1     | Y1     | Probid1 | X2     | Y2     | Probid2 | X3     | Y3     | Probid3 | X4     | Y4     | Pr |
| 2  | 815.46 | 77.413 | 0.92244 | 912.39 | 436.59 | 0.82216 | 921.27 | 469.88 | 0.97348 | 971.75 | 500.04 |    |
| 3  | 815.92 | 77.648 | 0.92244 | 913.06 | 435.82 | 0.82216 | 922.19 | 473.83 | 0.97348 | 972.1  | 496.19 |    |
| 4  | 815.46 | 77.753 | 0.92244 | 913.97 | 434.78 | 0.82216 | 924.38 | 478.29 | 0.97348 | 972.6  | 492.04 |    |
| 5  | 814.52 | 77.902 | 0.92244 | 914.61 | 434.15 | 0.82216 | 926.51 | 481.48 | 0.97348 | 973.08 | 488.54 |    |
| 6  | 814.22 | 78.115 | 0.92244 | 915.41 | 432.96 | 0.82216 | 928.77 | 484.44 | 0.97348 | 973.79 | 484.39 |    |
| 7  | 813.9  | 78.295 | 0.92244 | 917.08 | 430.22 | 0.82216 | 930.6  | 486.73 | 0.97348 | 974.51 | 481.25 |    |
| 8  | 813.23 | 78.525 | 0.92244 | 921.9  | 424.18 | 0.82216 | 932.43 | 489.16 | 0.97348 | 975.26 | 478.36 |    |
| 9  | 813.51 | 78.757 | 0.92244 | 920.3  | 427.35 | 0.82216 | 934.16 | 491.56 | 0.97348 | 976.17 | 475.26 |    |
| 10 | 811.58 | 78.627 | 0.92244 | 919.75 | 428.61 | 0.82216 | 935.9  | 494.05 | 0.97348 | 977.12 | 472.06 |    |
| 11 | 811.53 | 78.856 | 0.92244 | 920.27 | 428.56 | 0.82216 | 937.51 | 496.27 | 0.97348 | 977.98 | 469.51 |    |
| 12 | 811.29 | 79.16  | 0.92244 | 920.87 | 428.05 | 0.82216 | 939.07 | 498.75 | 0.97348 | 978.63 | 466.99 |    |
| 13 | 811.3  | 79.39  | 0.92244 | 921.6  | 427.73 | 0.82216 | 940.21 | 500.37 | 0.97348 | 979.42 | 464.4  |    |
| 14 | 810.77 | 79.569 | 0.92244 | 923.72 | 425.48 | 0.82216 | 941.11 | 501.61 | 0.97348 | 980.22 | 461.87 |    |
| 15 | 809.54 | 79.505 | 0.92244 | 924.99 | 422.94 | 0.82216 | 942.16 | 503.18 | 0.97348 | 980.85 | 459.7  |    |
| 16 | 809.16 | 79.682 | 0.92244 | 924.45 | 423.69 | 0.82216 | 943.96 | 506.17 | 0.97348 | 981.38 | 457.67 |    |
| 17 | 807.58 | 79.756 | 0.92244 | 924.21 | 420.8  | 0.82216 | 945.6  | 508.21 | 0.97348 | 982.12 | 455.55 |    |
| 18 | 806.4  | 79.931 | 0.92244 | 924.84 | 416.07 | 0.82216 | 949.49 | 510.02 | 0.97348 | 983.25 | 451.69 |    |
| 19 | 804.85 | 80.023 | 0.92244 | 926.94 | 409.29 | 0.82216 | 953.36 | 511.29 | 0.97348 | 982.87 | 448.93 |    |
| 20 | 805.59 | 80.224 | 0.92244 | 928.3  | 406.7  | 0.82216 | 958.26 | 513.12 | 0.97348 | 981.49 | 445.08 |    |
| 21 | 805.6  | 80.473 | 0.92244 | 930.27 | 401.99 | 0.82216 | 962.85 | 514.91 | 0.97348 | 979.51 | 438.45 |    |
| 22 | 804.76 | 80.668 | 0.92244 | 932.17 | 397.04 | 0.82216 | 966.78 | 516.47 | 0.97348 | 978.31 | 431.31 |    |
| 23 | 803.7  | 80.823 | 0.92244 | 933.49 | 393.24 | 0.82216 | 970.25 | 517.97 | 0.97348 | 977.72 | 424.29 |    |
| 24 | 802.38 | 80.939 | 0.92244 | 934.51 | 389.82 | 0.82216 | 972.77 | 519.12 | 0.97348 | 977.31 | 417.3  |    |
| 25 | 802.44 | 81.142 | 0.92244 | 935.63 | 385.52 | 0.82216 | 974.81 | 520.13 | 0.97348 | 977.13 | 411.91 |    |
| 26 | 803.08 | 81.373 | 0.92244 | 936.67 | 381.78 | 0.82216 | 976.99 | 521.29 | 0.97348 | 976.79 | 406.14 |    |
| 27 | 803.46 | 81.726 | 0.92244 | 937.5  | 378.46 | 0.82216 | 979.06 | 522.53 | 0.97348 | 976.28 | 400.99 |    |
| 28 | 801.26 | 81.752 | 0.92244 | 938.17 | 374.61 | 0.82216 | 980.81 | 523.39 | 0.97348 | 975.65 | 395.89 |    |

- Each row corresponds to one frame of the video
  - Columns 1 and 2 are the x and y coordinates of individual 1, respectively, and so forth
- There is an estimation of the probability of correct assignment for each frame and it is usually conservative
  - The probabilities for individual 1 are in column 3, for individual 2 in column 6, and so on



## 3D tracking by running idTracker twice

- XYZ Axis

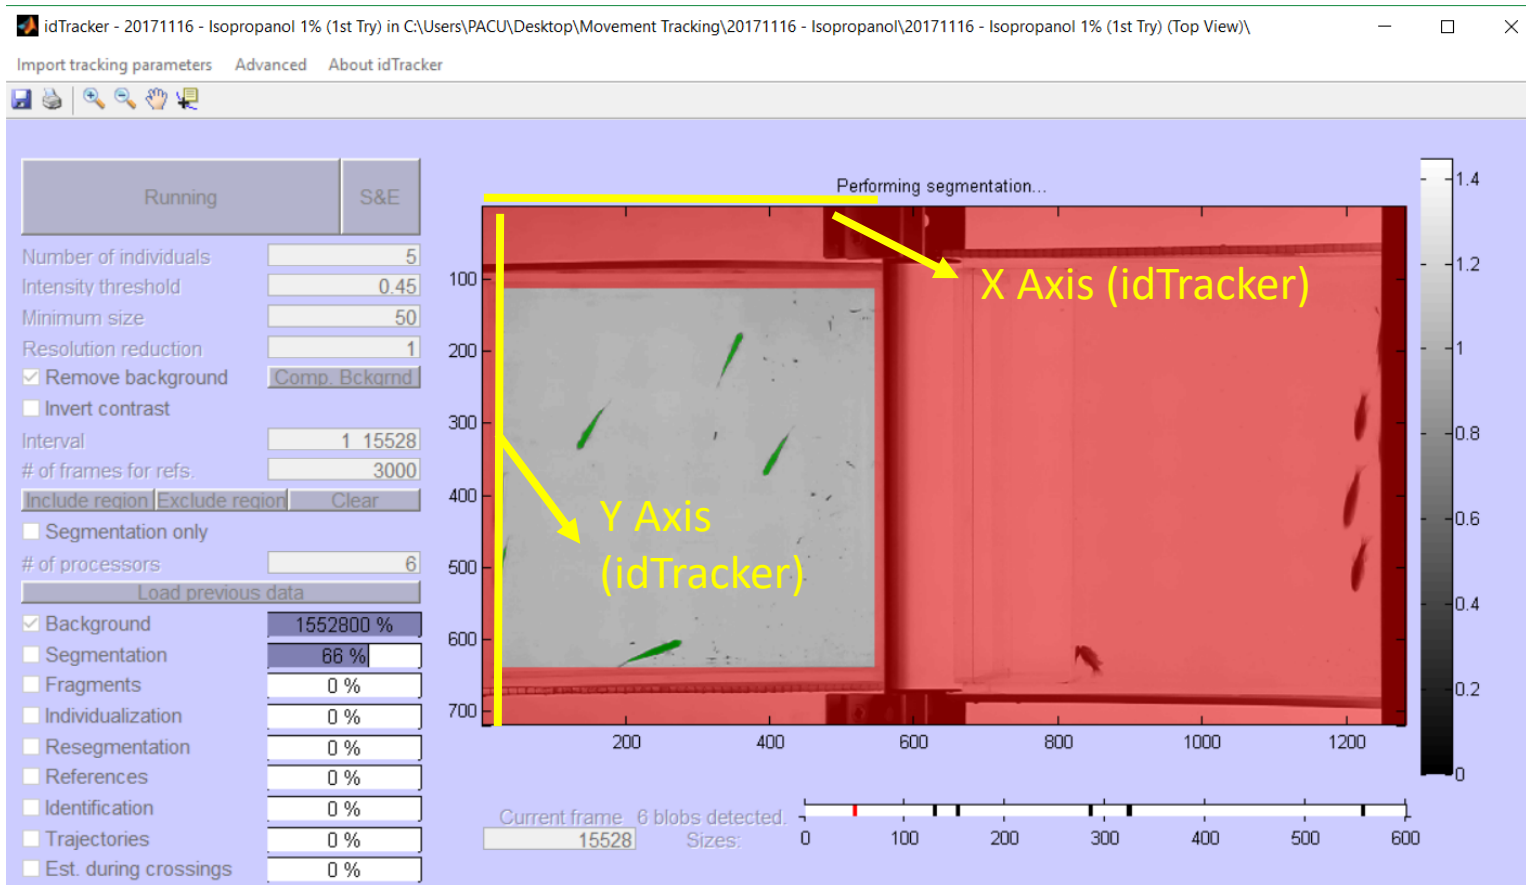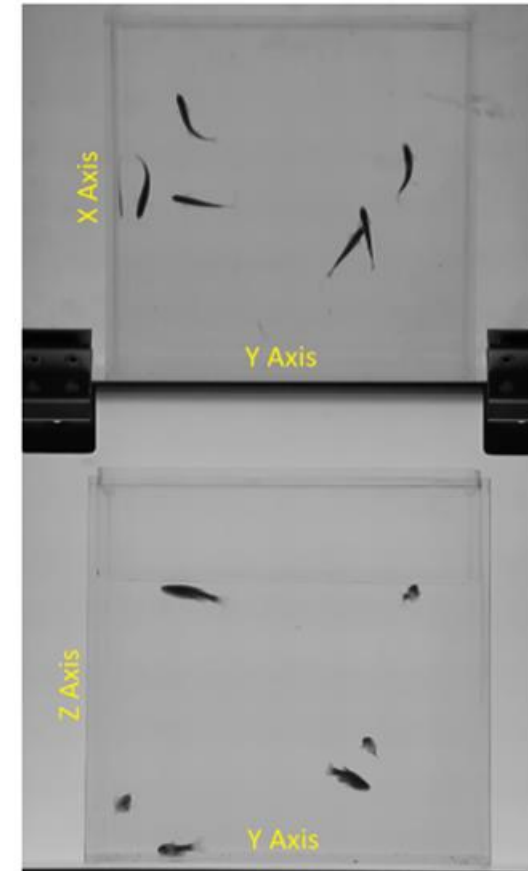

## 3D tracking by running idTracker twice

**X Axis in idTracker = X axis in real image**

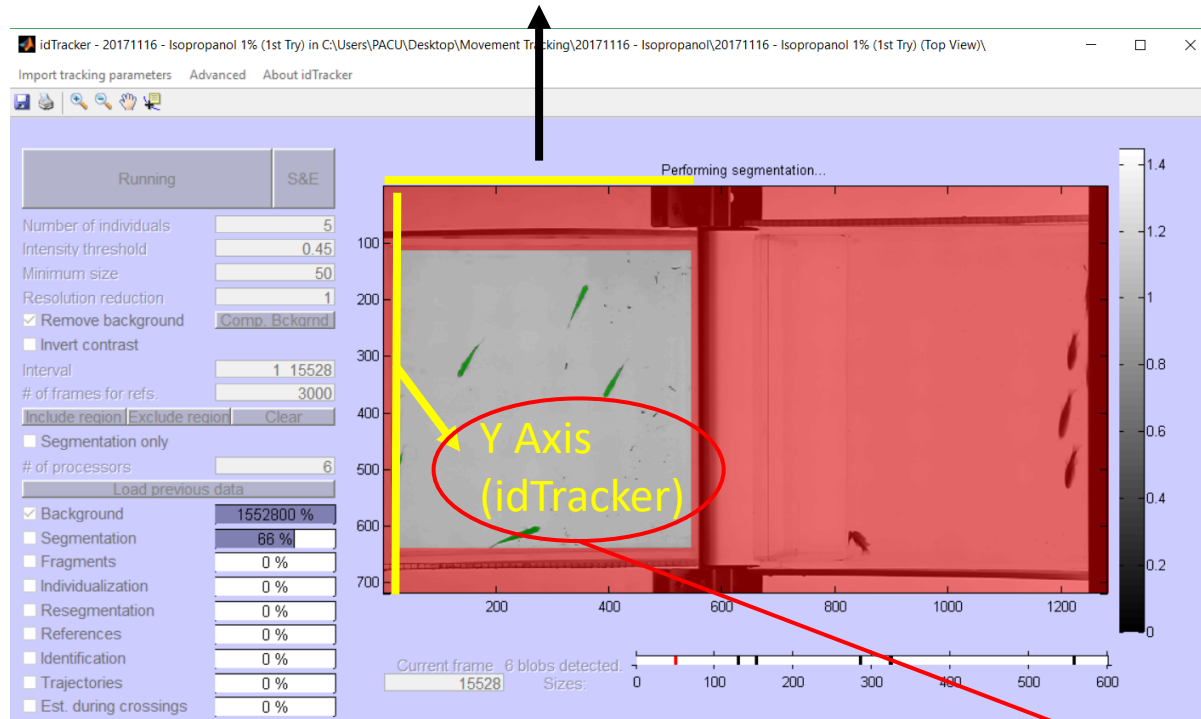

**X Axis in idTracker = Z axis in real image**

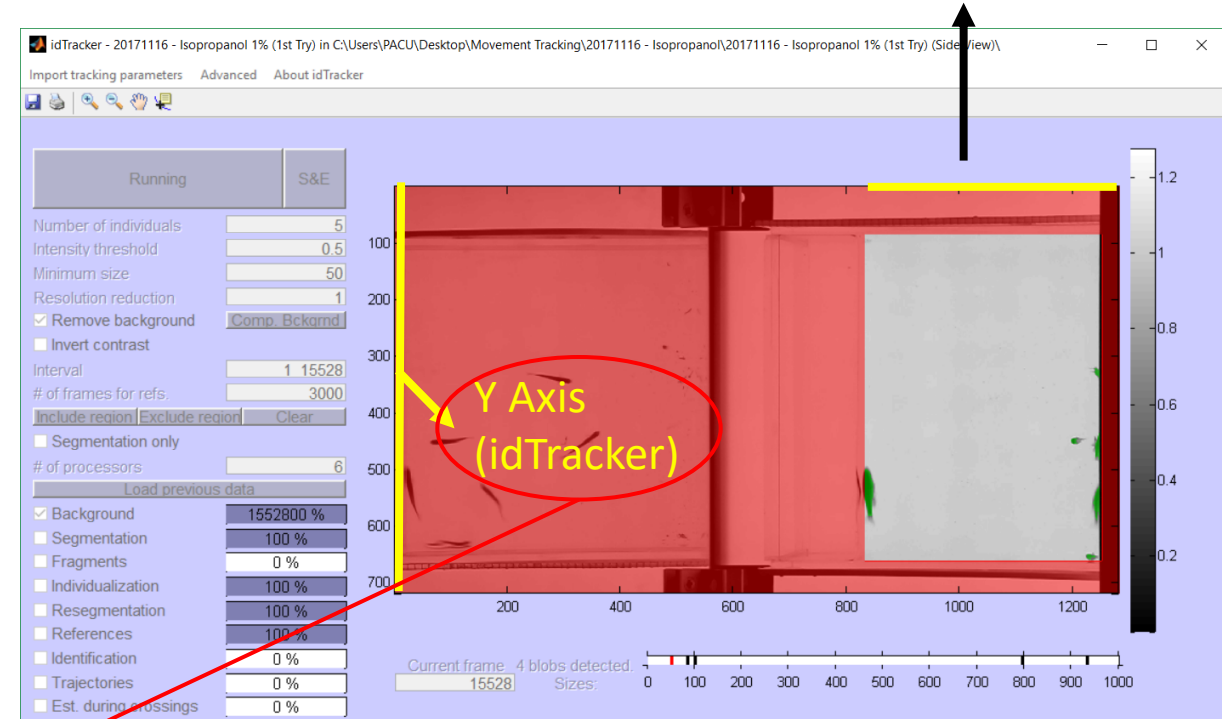

**Both two images share the similar Y axis position pattern**

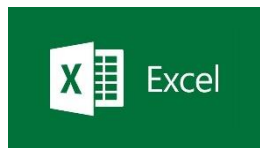

# Merge two XY and YZ dataset by searching object in specific frame **with the same Y position**

data matrix before merging

|    | A       | B       | C       | D       | E       | F       | G       | H       | I       | J       | K       | L       | M | N       | O       | P       | Q       | R       | S       | T       | U       | V       | W       | X       | Y       |
|----|---------|---------|---------|---------|---------|---------|---------|---------|---------|---------|---------|---------|---|---------|---------|---------|---------|---------|---------|---------|---------|---------|---------|---------|---------|
| 1  | Fish 2  |         | Fish 4  |         | Fish 3  |         | Fish 5  |         | Fish 1  |         | Fish 6  |         |   | Fish 1  |         | Fish 2  |         | Fish 3  |         | Fish 4  |         | Fish 5  |         | Fish 6  |         |
| 2  | X1 (SV) | Y1 (SV) | X2 (SV) | Y2 (SV) | X3 (SV) | Y3 (SV) | X4 (SV) | Y4 (SV) | X5 (SV) | Y5 (SV) | X6 (SV) | Y6 (SV) |   | X1 (TV) | Y1 (TV) | X2 (TV) | Y2 (TV) | X3 (TV) | Y3 (TV) | X4 (TV) | Y4 (TV) | X5 (TV) | Y5 (TV) | X6 (TV) | Y6 (TV) |
| 3  | 887.02  | 474.96  | 1156.3  | 116.32  | 994.96  | 241.92  | 900.06  | 417.6   | 1003.9  | 337.76  | 1040.1  | 108.94  |   | 166.46  | 338.41  | 268.05  | 457.12  | 106.25  | 254.12  | 400.17  | 124.6   | 460.84  | 420.91  | 279.88  | 132.92  |
| 4  | 887.31  | 473.95  | 1156    | 117.49  | 995.35  | 242.58  | 900.04  | 420.52  | 1004.3  | 340.23  | 1041.8  | 109.99  |   | 168.7   | 340.56  | 266.85  | 456.3   | 106.35  | 254.69  | 398.24  | 124.82  | 461.45  | 423.28  | 279.68  | 131.6   |
| 5  | 887.75  | 472.69  | 1156.4  | 117.64  | 996.07  | 243.31  | 900.35  | 423.05  | 1005.1  | 342.62  | 1043.5  | 111.26  |   | 171.79  | 342.82  | 265.41  | 454.97  | 106.84  | 255.56  | 396.69  | 124.84  | 462.6   | 425.69  | 279.78  | 130.83  |
| 6  | 888.69  | 472.51  | 1157    | 117.15  | 997.18  | 245.32  | 901.04  | 427.07  | 1006.2  | 346.22  | 1045.6  | 113.21  |   | 174.8   | 345.8   | 264.59  | 454.82  | 107.53  | 258.2   | 394.96  | 125.11  | 464.04  | 429.08  | 279.99  | 131.26  |
| 7  | 889.39  | 472.01  | 1157.6  | 115.32  | 998.04  | 247.71  | 901.65  | 430.19  | 1007.1  | 349.32  | 1048    | 114.37  |   | 177.62  | 348.55  | 263.28  | 454.11  | 108.32  | 258.94  | 393.8   | 125.53  | 465.31  | 432.15  | 280.87  | 130.73  |
| 8  | 889.85  | 470.21  | 1157.9  | 113.3   | 998.69  | 248.09  | 901.9   | 432.24  | 1007.5  | 350.83  | 1050.3  | 114.06  |   | 180.31  | 350.49  | 261.72  | 452.53  | 108.51  | 259.5   | 392.57  | 125.21  | 466.4   | 434.62  | 281.73  | 129.43  |
| 9  | 890.16  | 469.52  | 1158.5  | 110.83  | 999.27  | 249.1   | 902.13  | 433.96  | 1008.1  | 353.25  | 1052.4  | 113.94  |   | 182.41  | 352.4   | 260.39  | 451.75  | 108.7   | 261.1   | 391.84  | 124.7   | 467.02  | 436.85  | 282.44  | 128.92  |
| 10 | 890.46  | 469.16  | 1158.4  | 110.3   | 999.61  | 250.71  | 902.34  | 433.81  | 1008.4  | 355.75  | 1054.3  | 113.32  |   | 184.47  | 354.48  | 259.29  | 451.35  | 108.66  | 261.87  | 390.09  | 123.3   | 467.66  | 439.59  | 283.39  | 128.78  |
| 11 | 891     | 468.78  | 1158.2  | 110.33  | 1000.3  | 251.78  | 902.71  | 435.51  | 1009.1  | 358.32  | 1056.6  | 111.33  |   | 186.93  | 356.96  | 257.91  | 450.64  | 108.89  | 263.41  | 388.96  | 122.96  | 468.64  | 442.72  | 284.79  | 127.79  |
| 12 | 891.51  | 467.66  | 1157.6  | 110.25  | 1001.1  | 253.06  | 903.45  | 436.54  | 1009.7  | 360.34  | 1058.7  | 110.1   |   | 189.33  | 359.06  | 256.65  | 449.67  | 109.34  | 264.42  | 387.8   | 122.41  | 469.57  | 445.34  | 286.95  | 126.2   |
| 13 | 892.34  | 466.77  | 1157.8  | 109.43  | 1002.1  | 253.81  | 904.07  | 437.46  | 1010.4  | 362.37  | 1059.4  | 110.36  |   | 192     | 361.05  | 255.6   | 448.55  | 109.69  | 265.17  | 385.86  | 121.51  | 470.65  | 447.65  | 290.29  | 124.7   |
| 14 | 892.78  | 466.16  | 1158.4  | 108.63  | 1002.7  | 255.21  | 904.5   | 438.02  | 1010.9  | 364.22  | 1060.5  | 109.96  |   | 193.77  | 362.84  | 254.37  | 447.92  | 109.75  | 266.4   | 383.12  | 121.73  | 471.31  | 450.32  | 285.94  | 125.72  |
| 15 | 893.53  | 466.16  | 1158.6  | 108.04  | 1003.2  | 256.68  | 904.82  | 438.9   | 1011.3  | 366.73  | 1061.8  | 109.92  |   | 195.84  | 365.19  | 252.83  | 447.53  | 109.8   | 267.47  | 380.4   | 122.59  | 471.87  | 453.17  | 296.72  | 124.26  |
| 16 | 893.68  | 465.21  | 1158.4  | 107.1   | 1003.7  | 257.27  | 905.13  | 440.47  | 1011.5  | 368.34  | 1062.9  | 108.57  |   | 197.3   | 366.6   | 251.95  | 446.93  | 109.71  | 268.19  | 378.34  | 123.26  | 472.34  | 455.31  | 299.76  | 124.03  |
| 17 | 894.32  | 464.93  | 1157.8  | 105.62  | 1004.3  | 258.59  | 905.47  | 440.66  | 1011.9  | 370.33  | 1064.3  | 108.15  |   | 199.15  | 368.08  | 250.07  | 445.68  | 109.75  | 268.55  | 376.34  | 123.56  | 472.8   | 456.96  | 303.91  | 123.28  |
| 18 | 895.29  | 465.07  | 1157.9  | 104.57  | 1005    | 259.5   | 905.96  | 441.37  | 1012.5  | 372.43  | 1065.7  | 107.55  |   | 201.13  | 369.71  | 249.06  | 445.18  | 109.93  | 270.03  | 373.68  | 123.81  | 473.55  | 459.42  | 309.1   | 122.49  |
| 19 | 895.92  | 465.41  | 1157.3  | 104.63  | 1005.6  | 261.3   | 906.46  | 441.92  | 1012.8  | 375.14  | 1066.8  | 107.86  |   | 203.21  | 372.39  | 247.91  | 445.14  | 110.04  | 271.14  | 370.52  | 124.46  | 474.06  | 461.87  | 315.94  | 122.13  |
| 20 | 896.59  | 464.68  | 1156.9  | 103.84  | 1006    | 263.07  | 907.01  | 442.78  | 1013.4  | 376.61  | 1067.4  | 107.91  |   | 204.84  | 373.52  | 246.82  | 444.21  | 110.49  | 273.18  | 370.33  | 124.06  | 474.9   | 463.79  | 314.55  | 121.77  |
| 21 | 899.09  | 465.89  | 1156.5  | 103.34  | 1006.6  | 264.9   | 906.78  | 445.59  | 1013.8  | 377.73  | 1068.1  | 107.75  |   | 206.29  | 374.83  | 245.84  | 443.55  | 111.15  | 274.63  | 370.13  | 123.66  | 475.52  | 465.59  | 313.16  | 121.4   |
| 22 | 898.91  | 464.14  | 1155.6  | 102.91  | 1006.8  | 266.81  | 907.01  | 448.94  | 1014.2  | 380.01  | 1068.4  | 107.48  |   | 208.05  | 376.65  | 244.89  | 443.25  | 111.74  | 275.79  | 370     | 124     | 476.12  | 467.52  | 313     | 121     |
| 23 | 899.83  | 466.04  | 1154.5  | 102.34  | 1007.5  | 268.88  | 909.5   | 455.5   | 1014.7  | 382.14  | 1069    | 107.42  |   | 210     | 378.27  | 244.34  | 442.59  | 112.66  | 277.79  | 369     | 124     | 476.86  | 469.59  | 313     | 120     |
| 24 | 899.54  | 463.95  | 1152.6  | 101.45  | 1007.8  | 271.7   | 911     | 465     | 1015.2  | 384.28  | 1069.3  | 108.03  |   | 212.06  | 380.44  | 242.69  | 440.3   | 113.6   | 280.77  | 369     | 124     | 477.62  | 471.22  | 313     | 121     |
| 25 | 899.26  | 461.87  | 1151    | 100.26  | 1008.5  | 273.93  | 910.88  | 467.41  | 1015.4  | 387.03  | 1069.1  | 108.43  |   | 213.77  | 383.16  | 242.54  | 438     | 114.52  | 283.33  | 368.71  | 123     | 478.44  | 472.78  | 316     | 123     |
| 26 | 898.97  | 459.79  | 1148.2  | 99.831  | 1008.8  | 276.84  | 910     | 470     | 1015.2  | 390.03  | 1069.1  | 106.39  |   | 214.38  | 386.04  | 242.72  | 435.69  | 114.99  | 286.14  | 368     | 123     | 479.06  | 474.66  | 317     | 124     |
| 27 | 898.69  | 457.71  | 1146.4  | 100.16  | 1009.1  | 280.17  | 910     | 472.38  | 1014.7  | 393.59  | 1069.5  | 103.43  |   | 214.82  | 389.85  | 243.18  | 434.4   | 115.22  | 288.62  | 368     | 125     | 479.56  | 476.5   | 319     | 124     |
| 28 | 898.41  | 455.63  | 1144.9  | 100.54  | 1009.3  | 282.66  | 910     | 474.75  | 1014    | 397.28  | 1068    | 103.35  |   | 215.08  | 393.04  | 243.55  | 433.26  | 115.4   | 291.62  | 365     | 115     | 480.08  | 478.35  | 320     | 124     |
| 29 | 898.12  | 453.55  | 1142.4  | 99.617  | 1009.5  | 285.52  | 910.01  | 477.13  | 1013.5  | 400.73  | 1067    | 104.15  |   | 215.24  | 395.78  | 244.46  | 430.33  | 115.61  | 293.74  | 367     | 115     | 480.67  | 480.01  | 318     | 112     |
| 30 | 897.84  | 451.47  | 1139.3  | 98.83   | 1009.9  | 287.8   | 910.01  | 479.51  | 1012.7  | 404.72  | 1066.2  | 104.34  |   | 215.14  | 400.32  | 244.78  | 428.93  | 115.75  | 295.2   | 367     | 116     | 481.32  | 481.49  | 311     | 113     |
| 31 | 897.56  | 449.39  | 1136.6  | 98.217  | 1010.4  | 290.48  | 910.01  | 481.88  | 1012    | 409.14  | 1064.9  | 102.22  |   | 215.16  | 404     | 245.58  | 426.99  | 116.03  | 296.68  | 367     | 117     | 481.87  | 483.04  | 306     | 114     |
| 32 | 897.27  | 447.31  | 1134    | 98.364  | 1010.7  | 293.01  | 910.01  | 484.26  | 1011.5  | 412.28  | 1063.9  | 101.39  |   | 215.24  | 407.38  | 245.97  | 426.4   | 116.45  | 299.65  | 367     | 118     | 482.6   | 485.01  | 298     | 114     |
| 33 | 896.99  | 445.23  | 1131.8  | 98.353  | 1010.9  | 295.9   | 909.89  | 486.67  | 1010.6  | 416.01  | 1063.5  | 101.05  |   | 214.96  | 410.77  | 247.23  | 425.01  | 116.91  | 302.41  | 367     | 119     | 482.85  | 486.49  | 296     | 115     |
| 34 | 896.7   | 443.15  | 1129.2  | 97.914  | 1010.9  | 298.63  | 909.77  | 489.07  | 1009.8  | 418.77  | 1062.5  | 100.45  |   | 214.73  | 413.09  | 249.33  | 423.76  | 117.5   | 304.66  | 367.62  | 118.48  | 483.26  | 487.95  | 295     | 116     |
| 35 | 896.52  | 441.4   | 1127.7  | 98.235  | 1011.6  | 301.49  | 910     | 492.42  | 1009.2  | 422.18  | 1062.6  | 100.56  |   | 214.61  | 416.1   | 251.31  | 422.71  | 118.7   | 306.9   | 367.42  | 118.08  | 483.71  | 489.09  | 293.72  | 116.3   |
| 36 | 896.23  | 438.18  | 1127    | 98.323  | 1011.9  | 304.52  | 910.36  | 492.67  | 1008.6  | 424.73  | 1062.7  | 100.33  |   | 214.4   | 418.34  | 253.95  | 420.34  | 119.77  | 309.67  | 367.23  | 117.68  | 484.29  | 490.85  | 292.33  | 115.93  |
| 37 | 896.17  | 434.81  | 1122.2  | 98.915  | 1012.5  | 306.95  | 910.52  | 492.95  | 1008.2  | 427.67  | 1062.9  | 101.22  |   | 214.31  | 421.02  | 257.69  | 416.89  | 120.85  | 312.33  | 375.39  | 118.53  | 485.03  | 492.23  | 289.28  | 116.69  |
| 38 | 896.11  | 430.86  | 1116.1  | 101.58  | 1012.9  | 309.58  | 910.72  | 495.76  | 1007.6  | 430.47  | 1062.7  | 102.96  |   | 214.05  | 423.59  | 260.32  | 413.71  | 121.78  | 315.52  | 383.66  | 120.43  | 485.38  | 493.23  | 289.92  | 119.74  |
| 39 | 896.11  | 427.3   | 1113.2  | 104.3   | 1013.2  | 313.65  | 911     | 495.92  | 1007    | 433.05  | 1062.9  | 106.11  |   | 213.88  | 426.04  | 263.77  | 407.5   | 122.47  | 319.23  | 388.78  | 122.73  | 485.78  | 494.88  | 290.31  | 123.09  |
| 40 | 896     | 424.17  | 1109.8  | 107.27  | 1013.4  | 316.81  | 911.1   | 497.26  | 1006.2  | 436.17  | 1063    | 110.16  |   | 213.51  | 428.97  | 263.67  | 406.05  | 122.93  | 322.28  | 392.12  | 124.87  | 486.09  | 496.61  | 290.66  | 126.75  |

- Use the video for confirmation
- SV : Side view
- TV : Top view

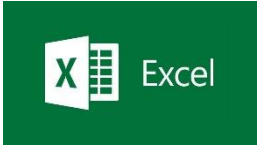

# Merge two XY and YZ dataset by searching object in specific frame **with the same Y position**

data matrix after merging

|    | A       | B       | C       | D       | E | F       | G       | H       | I       | J | K       | L       | M       | N       | O | P       | Q       | R       | S       | T | U       | V       | W       | X       | Y | Z       | AA      | AB      | AC      |
|----|---------|---------|---------|---------|---|---------|---------|---------|---------|---|---------|---------|---------|---------|---|---------|---------|---------|---------|---|---------|---------|---------|---------|---|---------|---------|---------|---------|
| 1  | Fish 1  |         |         |         |   | Fish 2  |         |         |         |   | Fish 3  |         |         |         |   | Fish 4  |         |         |         |   | Fish 5  |         |         |         |   | Fish 6  |         |         |         |
| 2  | X1 (TV) | Y1 (TV) | X5 (SV) | Y5 (SV) |   | X2 (TV) | Y2 (TV) | X1 (SV) | Y1 (SV) |   | X3 (TV) | Y3 (TV) | X3 (SV) | Y3 (SV) |   | X4 (TV) | Y4 (TV) | X2 (SV) | Y2 (SV) |   | X5 (TV) | Y5 (TV) | X4 (SV) | Y4 (SV) |   | X6 (TV) | Y6 (TV) | X6 (SV) | Y6 (SV) |
| 3  | 166.46  | 338.41  | 1003.9  | 337.76  |   | 268.05  | 457.12  | 887.02  | 474.96  |   | 106.25  | 254.12  | 994.96  | 241.92  |   | 400.17  | 124.6   | 1156.3  | 116.32  |   | 460.84  | 420.91  | 900.06  | 417.6   |   | 279.88  | 132.92  | 1040.1  | 108.94  |
| 4  | 168.7   | 340.56  | 1004.3  | 340.23  |   | 266.85  | 456.3   | 887.31  | 473.95  |   | 106.35  | 254.69  | 995.35  | 242.58  |   | 398.24  | 124.82  | 1156    | 117.49  |   | 461.45  | 423.28  | 900.04  | 420.52  |   | 279.68  | 131.6   | 1041.8  | 109.99  |
| 5  | 171.79  | 342.82  | 1005.1  | 342.62  |   | 265.41  | 454.97  | 887.75  | 472.69  |   | 106.84  | 255.56  | 996.07  | 243.31  |   | 396.69  | 124.84  | 1156.4  | 117.64  |   | 462.6   | 425.69  | 900.35  | 423.05  |   | 279.78  | 130.83  | 1043.5  | 111.26  |
| 6  | 174.8   | 345.8   | 1006.2  | 346.22  |   | 264.59  | 454.82  | 888.69  | 472.51  |   | 107.53  | 258.2   | 997.18  | 245.32  |   | 394.96  | 125.11  | 1157    | 117.15  |   | 464.04  | 429.08  | 901.04  | 427.07  |   | 279.99  | 131.26  | 1045.6  | 113.21  |
| 7  | 177.62  | 348.55  | 1007.1  | 349.32  |   | 263.28  | 454.11  | 889.39  | 472.01  |   | 108.32  | 258.94  | 998.04  | 247.71  |   | 393.8   | 125.53  | 1157.6  | 115.32  |   | 465.31  | 432.15  | 901.65  | 430.19  |   | 280.87  | 130.73  | 1048    | 114.37  |
| 8  | 180.31  | 350.49  | 1007.5  | 350.83  |   | 261.72  | 452.53  | 889.85  | 470.21  |   | 108.51  | 259.5   | 998.69  | 248.09  |   | 392.57  | 125.21  | 1157.9  | 113.3   |   | 466.4   | 434.62  | 901.9   | 432.24  |   | 281.73  | 129.43  | 1050.3  | 114.06  |
| 9  | 182.41  | 352.4   | 1008.1  | 353.25  |   | 260.39  | 451.75  | 890.16  | 469.52  |   | 108.7   | 261.1   | 999.27  | 249.1   |   | 391.84  | 124.7   | 1158.5  | 110.83  |   | 467.02  | 436.85  | 902.13  | 433.96  |   | 282.44  | 128.92  | 1052.4  | 113.94  |
| 10 | 184.47  | 354.48  | 1008.4  | 355.75  |   | 259.29  | 451.35  | 890.46  | 469.16  |   | 108.66  | 261.87  | 999.61  | 250.71  |   | 390.09  | 123.3   | 1158.4  | 110.3   |   | 467.66  | 439.59  | 902.34  | 433.81  |   | 283.39  | 128.78  | 1054.3  | 113.32  |
| 11 | 186.93  | 356.96  | 1009.1  | 358.32  |   | 257.91  | 450.64  | 891     | 468.78  |   | 108.89  | 263.41  | 1000.3  | 251.78  |   | 388.96  | 122.96  | 1158.2  | 110.33  |   | 468.64  | 442.72  | 902.71  | 435.51  |   | 284.79  | 127.79  | 1056.6  | 111.33  |
| 12 | 189.33  | 359.06  | 1009.7  | 360.34  |   | 256.65  | 449.67  | 891.51  | 467.66  |   | 109.34  | 264.42  | 1001.1  | 253.06  |   | 387.8   | 122.41  | 1157.6  | 110.25  |   | 469.57  | 445.34  | 903.45  | 436.54  |   | 286.95  | 126.2   | 1058.7  | 110.1   |
| 13 | 192     | 361.05  | 1010.4  | 362.37  |   | 255.6   | 448.55  | 892.34  | 466.77  |   | 109.69  | 265.17  | 1002.1  | 253.81  |   | 385.86  | 121.51  | 1157.8  | 109.43  |   | 470.65  | 447.65  | 904.07  | 437.46  |   | 290.29  | 124.7   | 1059.4  | 110.36  |
| 14 | 193.77  | 362.84  | 1010.9  | 364.22  |   | 254.37  | 447.92  | 892.78  | 466.16  |   | 109.75  | 266.4   | 1002.7  | 255.21  |   | 383.12  | 121.73  | 1158.4  | 108.63  |   | 471.31  | 450.32  | 904.5   | 438.02  |   | 285.94  | 125.72  | 1060.5  | 109.96  |
| 15 | 195.84  | 365.19  | 1011.3  | 366.73  |   | 252.83  | 447.53  | 893.53  | 466.16  |   | 109.8   | 267.47  | 1003.2  | 256.68  |   | 380.4   | 122.59  | 1158.6  | 108.04  |   | 471.87  | 453.17  | 904.82  | 438.9   |   | 296.72  | 124.26  | 1061.8  | 109.92  |
| 16 | 197.3   | 366.6   | 1011.5  | 368.34  |   | 251.95  | 446.93  | 893.68  | 465.21  |   | 109.71  | 268.19  | 1003.7  | 257.27  |   | 378.34  | 123.26  | 1158.4  | 107.1   |   | 472.34  | 455.31  | 905.13  | 440.47  |   | 299.76  | 124.03  | 1062.9  | 108.57  |
| 17 | 199.15  | 368.08  | 1011.9  | 370.33  |   | 250.07  | 445.68  | 894.32  | 464.93  |   | 109.75  | 268.55  | 1004.3  | 258.59  |   | 376.34  | 123.56  | 1157.8  | 105.62  |   | 472.8   | 456.96  | 905.47  | 440.66  |   | 303.91  | 123.28  | 1064.3  | 108.15  |
| 18 | 201.13  | 369.71  | 1012.5  | 372.43  |   | 249.06  | 445.18  | 895.29  | 465.07  |   | 109.93  | 270.03  | 1005    | 259.5   |   | 373.68  | 123.81  | 1157.9  | 104.57  |   | 473.55  | 459.42  | 905.96  | 441.37  |   | 309.1   | 122.49  | 1065.7  | 107.55  |
| 19 | 203.21  | 372.39  | 1012.8  | 375.14  |   | 247.91  | 445.14  | 895.92  | 465.41  |   | 110.04  | 271.14  | 1005.6  | 261.3   |   | 370.52  | 124.46  | 1157.3  | 104.63  |   | 474.06  | 461.87  | 906.46  | 441.92  |   | 315.94  | 122.13  | 1066.8  | 107.86  |
| 20 | 204.84  | 373.52  | 1013.4  | 376.61  |   | 246.82  | 444.21  | 896.59  | 464.68  |   | 110.49  | 273.18  | 1006    | 263.07  |   | 370.33  | 124.06  | 1156.9  | 103.84  |   | 474.9   | 463.79  | 907.01  | 442.78  |   | 314.55  | 121.77  | 1067.4  | 107.91  |
| 21 | 206.29  | 374.83  | 1013.8  | 377.73  |   | 245.84  | 443.55  | 899.09  | 465.89  |   | 111.15  | 274.63  | 1006.6  | 264.9   |   | 370.13  | 123.66  | 1156.5  | 103.34  |   | 475.52  | 465.59  | 906.78  | 445.59  |   | 313.16  | 121.4   | 1068.1  | 107.75  |
| 22 | 208.05  | 376.65  | 1014.2  | 380.01  |   | 244.89  | 443.25  | 898.91  | 464.14  |   | 111.74  | 275.79  | 1006.8  | 266.81  |   | 370     | 124     | 1155.6  | 102.91  |   | 476.12  | 467.52  | 907.01  | 448.94  |   | 313     | 121     | 1068.4  | 107.48  |
| 23 | 210     | 378.27  | 1014.7  | 382.14  |   | 244.34  | 442.59  | 899.83  | 466.04  |   | 112.66  | 277.79  | 1007.5  | 268.88  |   | 369     | 124     | 1154.5  | 102.34  |   | 476.86  | 469.59  | 909.5   | 455.5   |   | 313     | 120     | 1069    | 107.42  |
| 24 | 212.06  | 380.44  | 1015.2  | 384.28  |   | 242.69  | 440.3   | 899.54  | 463.95  |   | 113.6   | 280.77  | 1007.8  | 271.7   |   | 369     | 124     | 1152.6  | 101.45  |   | 477.62  | 471.22  | 911     | 465     |   | 313     | 121     | 1069.3  | 108.03  |
| 25 | 213.77  | 383.16  | 1015.4  | 387.03  |   | 242.54  | 438     | 899.26  | 461.87  |   | 114.52  | 283.33  | 1008.5  | 273.93  |   | 368.71  | 123     | 1151    | 100.26  |   | 478.44  | 472.78  | 910.88  | 467.41  |   | 316     | 123     | 1069.1  | 108.43  |
| 26 | 214.38  | 386.04  | 1015.2  | 390.03  |   | 242.72  | 435.69  | 898.97  | 459.79  |   | 114.99  | 286.14  | 1008.8  | 276.84  |   | 368     | 123     | 1148.2  | 99.831  |   | 479.06  | 474.66  | 910     | 470     |   | 317     | 124     | 1069.1  | 106.39  |
| 27 | 214.82  | 389.85  | 1014.7  | 393.59  |   | 243.18  | 434.4   | 898.69  | 457.71  |   | 115.22  | 288.62  | 1009.1  | 280.17  |   | 368     | 125     | 1146.4  | 100.16  |   | 479.56  | 476.5   | 910     | 472.38  |   | 319     | 124     | 1069.5  | 103.43  |
| 28 | 215.08  | 393.04  | 1014    | 397.28  |   | 243.55  | 433.26  | 898.41  | 455.63  |   | 115.4   | 291.62  | 1009.3  | 282.66  |   | 365     | 115     | 1144.9  | 100.54  |   | 480.08  | 478.35  | 910     | 474.75  |   | 320     | 124     | 1068    | 103.35  |
| 29 | 215.24  | 395.78  | 1013.5  | 400.73  |   | 244.46  | 430.33  | 898.12  | 453.55  |   | 115.61  | 293.74  | 1009.5  | 285.52  |   | 367     | 115     | 1142.4  | 99.617  |   | 480.67  | 480.01  | 910.01  | 477.13  |   | 318     | 112     | 1067    | 104.15  |
| 30 | 215.14  | 400.32  | 1012.7  | 404.72  |   | 244.78  | 428.93  | 897.84  | 451.47  |   | 115.75  | 295.2   | 1009.9  | 287.8   |   | 367     | 116     | 1139.3  | 98.83   |   | 481.32  | 481.49  | 910.01  | 479.51  |   | 311     | 113     | 1066.2  | 104.34  |
| 31 | 215.16  | 404     | 1012    | 409.14  |   | 245.58  | 426.99  | 897.56  | 449.39  |   | 116.03  | 296.68  | 1010.4  | 290.48  |   | 367     | 117     | 1136.6  | 98.217  |   | 481.87  | 483.04  | 910.01  | 481.88  |   | 306     | 114     | 1064.9  | 102.22  |
| 32 | 215.24  | 407.38  | 1011.5  | 412.28  |   | 245.97  | 426.4   | 897.27  | 447.31  |   | 116.45  | 299.65  | 1010.7  | 293.01  |   | 367     | 118     | 1134    | 98.364  |   | 482.6   | 485.01  | 910.01  | 484.26  |   | 298     | 114     | 1063.9  | 101.39  |
| 33 | 214.96  | 410.77  | 1010.6  | 416.01  |   | 247.23  | 425.01  | 896.99  | 445.23  |   | 116.91  | 302.41  | 1010.9  | 295.9   |   | 367     | 119     | 1131.8  | 98.353  |   | 482.85  | 486.49  | 909.89  | 486.67  |   | 296     | 115     | 1063.5  | 101.05  |
| 34 | 214.73  | 413.09  | 1009.8  | 418.77  |   | 249.33  | 423.76  | 896.7   | 443.15  |   | 117.5   | 304.66  | 1010.9  | 298.63  |   | 367.62  | 118.48  | 1129.2  | 97.914  |   | 483.26  | 487.95  | 909.77  | 489.07  |   | 295     | 116     | 1062.5  | 100.45  |
| 35 | 214.61  | 416.1   | 1009.2  | 422.18  |   | 251.31  | 422.71  | 896.52  | 441.4   |   | 118.7   | 306.9   | 1011.6  | 301.49  |   | 367.42  | 118.08  | 1127.7  | 98.235  |   | 483.71  | 489.09  | 910     | 492.42  |   | 293.72  | 116.3   | 1062.6  | 100.56  |
| 36 | 214.4   | 418.34  | 1008.6  | 424.73  |   | 253.95  | 420.34  | 896.23  | 438.18  |   | 119.77  | 309.67  | 1011.9  | 304.52  |   | 367.23  | 117.68  | 1127    | 98.323  |   | 484.29  | 490.85  | 910.36  | 492.67  |   | 292.33  | 115.93  | 1062.7  | 100.33  |
| 37 | 214.31  | 421.02  | 1008.2  | 427.67  |   | 257.69  | 416.89  | 896.17  | 434.81  |   | 120.85  | 312.33  | 1012.5  | 306.95  |   | 375.39  | 118.53  | 1122.2  | 98.915  |   | 485.03  | 492.23  | 910.52  | 492.95  |   | 289.28  | 116.69  | 1062.9  | 101.22  |
| 38 | 214.05  | 423.59  | 1007.6  | 430.47  |   | 260.32  | 413.71  | 896.11  | 430.86  |   | 121.78  | 315.52  | 1012.9  | 309.58  |   | 383.66  | 120.43  | 1116.1  | 101.58  |   | 485.38  | 493.23  | 910.72  | 495.76  |   | 289.92  | 119.74  | 1062.7  | 102.96  |
| 39 | 213.88  | 426.04  | 1007    | 433.05  |   | 263.77  | 407.5   | 896.11  | 427.3   |   | 122.47  | 319.23  | 1013.2  | 313.65  |   | 388.78  | 122.73  | 1113.2  | 104.3   |   | 485.78  | 494.88  | 911     | 495.92  |   | 290.31  | 123.09  | 1062.9  | 106.11  |
| 40 | 213.51  | 428.97  | 1006.2  | 436.17  |   | 263.67  | 406.05  | 896     | 424.17  |   | 122.93  | 322.28  | 1013.4  | 316.81  |   | 392.12  | 124.87  | 1109.8  | 107.27  |   | 486.09  | 496.61  | 911.1   | 497.26  |   | 290.66  | 126.75  | 1063    | 110.16  |

- Use the Y Axis from the Top View (TV) if the conversion that will be used is also TV conversion

X Axis Y Axis Z Axis X Axis Y Axis Z Axis



# Convert pixel to real distance by using **ImageJ** (Top View Conversion)

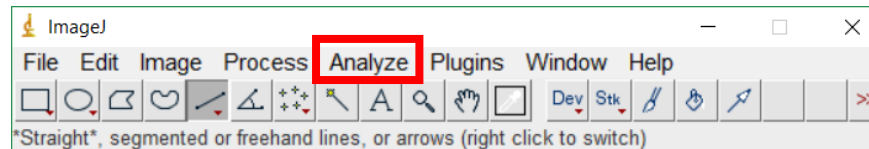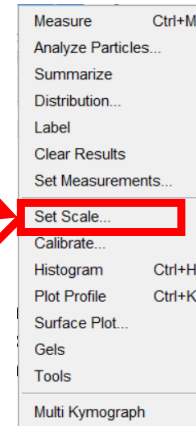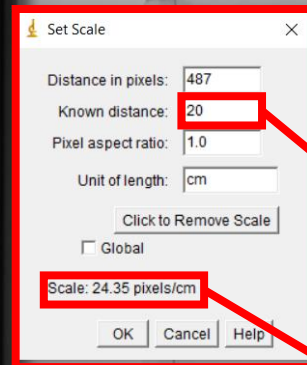

- Convert the pixel dimension into the standard length dimension using **ImageJ**
- Real Size measured by ruler
- Top View Conversion from pixel to cm

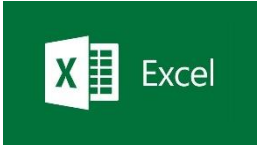

# Calculate fish movement by using Excel

| X1     | Y1     | Distance and Velocity |               |              |                      |                      |                     | Average speed (cm/s) |
|--------|--------|-----------------------|---------------|--------------|----------------------|----------------------|---------------------|----------------------|
|        |        | Distance (pixel)      | Distance (cm) | Speed (cm/s) | Maximum speed (cm/s) | Minimum speed (cm/s) | Total distance (cm) |                      |
| 866.58 | 409.89 | 0.272946881           | 0.009821943   | 0.491097143  | 124.6146758          | 0                    | 433.1221536         | 7.201898132          |
| 866.54 | 410.16 | 2.646091457           | 0.09521911    | 4.7609555    |                      |                      |                     |                      |
| 865.91 | 412.73 | 2.500599928           | 0.089983624   | 4.499181216  |                      |                      |                     |                      |
| 865.32 | 415.16 | 2.822357171           | 0.101561999   | 5.078099949  |                      |                      |                     |                      |
| 864.73 | 417.92 | 6.246350935           | 0.224773779   | 11.23868896  |                      |                      |                     |                      |
| 863.53 | 424.05 | 2.156965461           | 0.077618002   | 3.88090009   |                      |                      |                     |                      |
| 863.19 | 426.18 | 0.471699057           | 0.016974003   | 0.84870015   |                      |                      |                     |                      |
| 863.36 | 425.74 | 2.025438224           | 0.072885019   | 3.64425093   |                      |                      |                     |                      |
| 863.04 | 427.74 | 1.808535319           | 0.065079808   | 3.25399039   |                      |                      |                     |                      |
| 862.72 | 429.52 | 2.526855754           | 0.090928435   | 4.546421767  |                      |                      |                     |                      |
| 862.29 | 432.01 | 1.969009903           | 0.070854456   | 3.542722797  |                      |                      |                     |                      |
| 861.9  | 433.94 | 2.546566316           | 0.091637716   | 4.581885812  |                      |                      |                     |                      |
| 861.47 | 436.45 | 1.62431524            | 0.058450682   | 2.922534123  |                      |                      |                     |                      |
| 861.19 | 438.05 | 5.246722787           | 0.188802346   | 9.440117286  |                      |                      |                     |                      |
| 860.24 | 443.21 | 1.019803903           | 0.036697454   | 1.834872709  |                      |                      |                     |                      |
| 860.44 | 442.21 | 5.089214085           | 0.183134424   | 9.156721216  |                      |                      |                     |                      |
| 859.44 | 447.2  | 1.223315168           | 0.044020769   | 2.201038464  |                      |                      |                     |                      |
| 859.26 | 448.41 | 1.170042734           | 0.042103771   | 2.105188532  |                      |                      |                     |                      |
| 859.63 | 447.3  | 2.211990054           | 0.079598052   | 3.979902579  |                      |                      |                     |                      |
| 859.4  | 449.5  | 1.568470593           | 0.056441123   | 2.822056159  |                      |                      |                     |                      |
| 859.16 | 451.05 | 0.850529247           | 0.030606137   | 1.530306855  |                      |                      |                     |                      |
| 859.13 | 451.9  | 1.77552809            | 0.063892049   | 3.194602441  |                      |                      |                     |                      |
| 858.99 | 453.67 | 1.520822146           | 0.054726503   | 2.736325134  |                      |                      |                     |                      |
| 858.94 | 455.19 | 2.377603836           | 0.085557633   | 4.277881638  |                      |                      |                     |                      |
| 858.75 | 457.56 | 2.293686988           | 0.082537901   | 4.126895029  |                      |                      |                     |                      |
| 858.62 | 459.85 | 0.830240929           | 0.029876066   | 1.493803287  |                      |                      |                     |                      |
| 858.64 | 460.68 | 1.540811475           | 0.055445815   | 2.772290747  |                      |                      |                     |                      |
| 858.59 | 462.22 | 1.210041322           | 0.043543112   | 2.177155619  |                      |                      |                     |                      |
| 858.6  | 463.43 | 1.350037037           | 0.048580832   | 2.42904161   |                      |                      |                     |                      |
| 858.59 | 464.78 | 1.694992625           | 0.060993995   | 3.049699752  |                      |                      |                     |                      |
| 858.46 | 466.47 | 0.820060973           | 0.029509742   | 1.475487096  |                      |                      |                     |                      |
| 858.45 | 467.29 | 0.672681202           | 0.024206308   | 1.210315411  |                      |                      |                     |                      |
| 858.51 | 467.96 | 1.562049935           | 0.056210077   | 2.810503851  |                      |                      |                     |                      |

- Use the Microsoft Excel's formula to calculate the fish's movement **frame by frame**
- Example : measure the fish's rate of speed by dividing the calculation results with the time

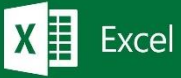

## Some results we can get from this analysis

- **Total distance traveled (cm)**

$$\sum \sqrt{(X_2 - X_1)^2 + (Y_2 - Y_1)^2 + (Z_2 - Z_1)^2}$$

- **Avg. swimming speed (cm/s)**

$$\frac{\text{Total distance (cm)}}{\text{Total Time (s)}}$$

- **Maximum speed (cm/s)**
- **Minimum speed (cm/s)**

- **Freezing Time (s)**

(Total Time when speed less than 1cm/s)

- **Swimming Time (s)**

(Total Time when speed 1-10 cm/s)

- **Rapid Movement Time (s)**

(Total Time when speed more than 10 cm/s)

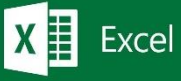

# Some results we can get from this analysis

- **Turning Angle (°)**

$$\frac{1}{\frac{\tan(\frac{\Delta Y}{\Delta X}) \times 180}{\pi}}$$

- **Fast Type Latent Time (s)**

(Total time when Angular velocity above 0.5°/ms)

- **Slow Type Latent Time (s)**

(Total time when Angular velocity below 0.5°/ms)

- **Angular Velocity (°/ms)**

$$\text{Turning Angle} \times \left( \frac{\text{Video duration (ms)}}{\text{Frame per second}} \right)$$

- **Absolute Turn Angle**

(Sum of all the Turning Angles without considering the sign of angular direction)





# Some results we can get from this analysis

- **Time spent in the top (%)**

Total time spent in the top part of the novel tank

- **Time spent in the bottom (%)**

Total time spent in the bottom part of the novel tank

- **Meandering (%/m)**

(The degree of turning vs. travel distance)

$$\left( \frac{\text{Absolute turn angle } (^{\circ})}{\text{Total distance (cm)}} \times 100 \right)$$

# Calculation of fish trajectory by ImageJ

- Trajectories → Fish position (cm) on every frames

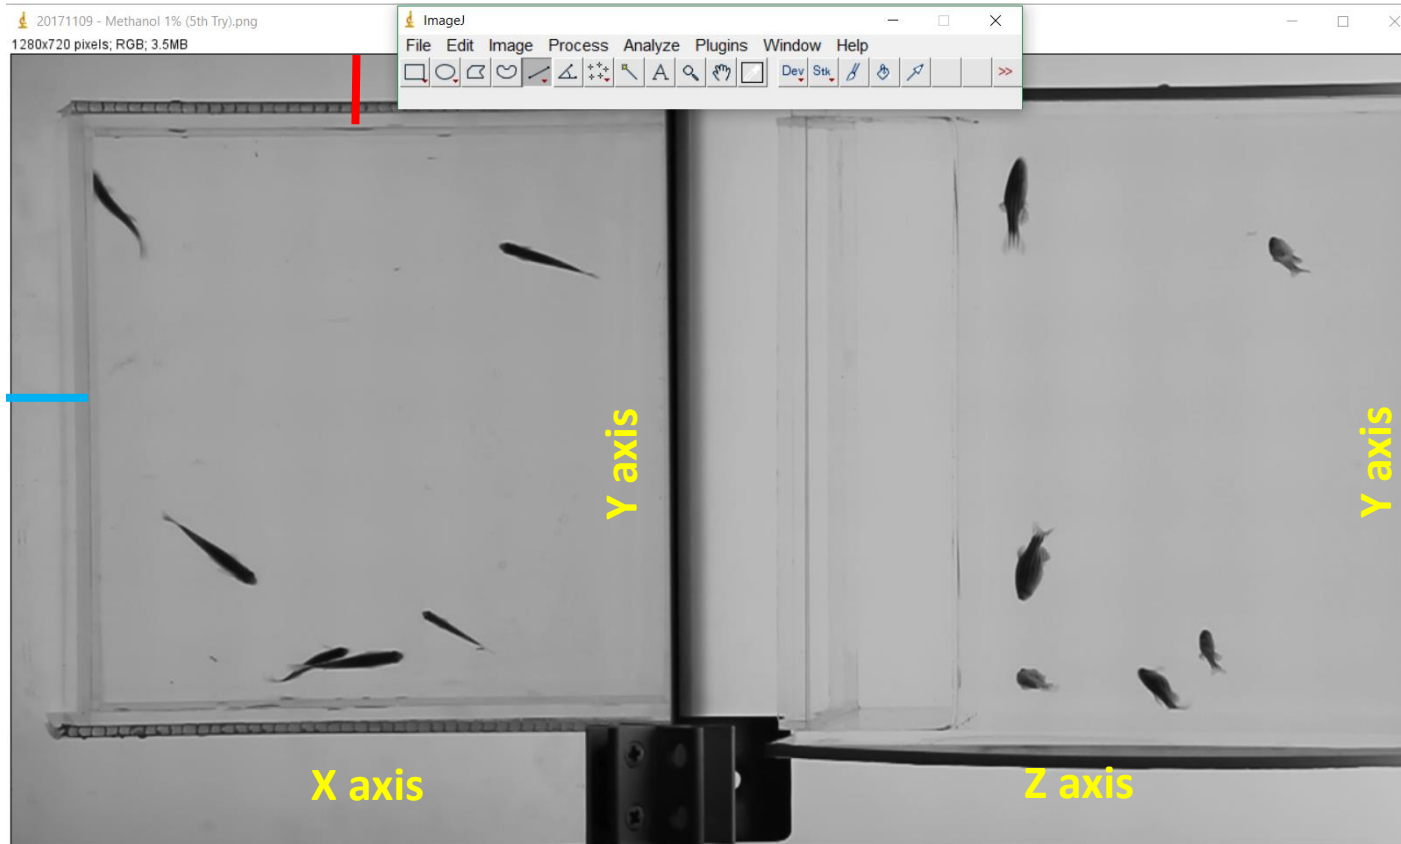

1280X720 pixel

- X position
  - $(X(TV) - \text{Blue}) / TV$  conversion
- Y Position
  - $(Y(TV) - \text{Red}) / TV$  conversion
- Z Position
  - $(1280 - X(SV) - \text{Yellow}) / SV$  conversion

# Plot fish 3D spatial trajectory by Origin 9.1

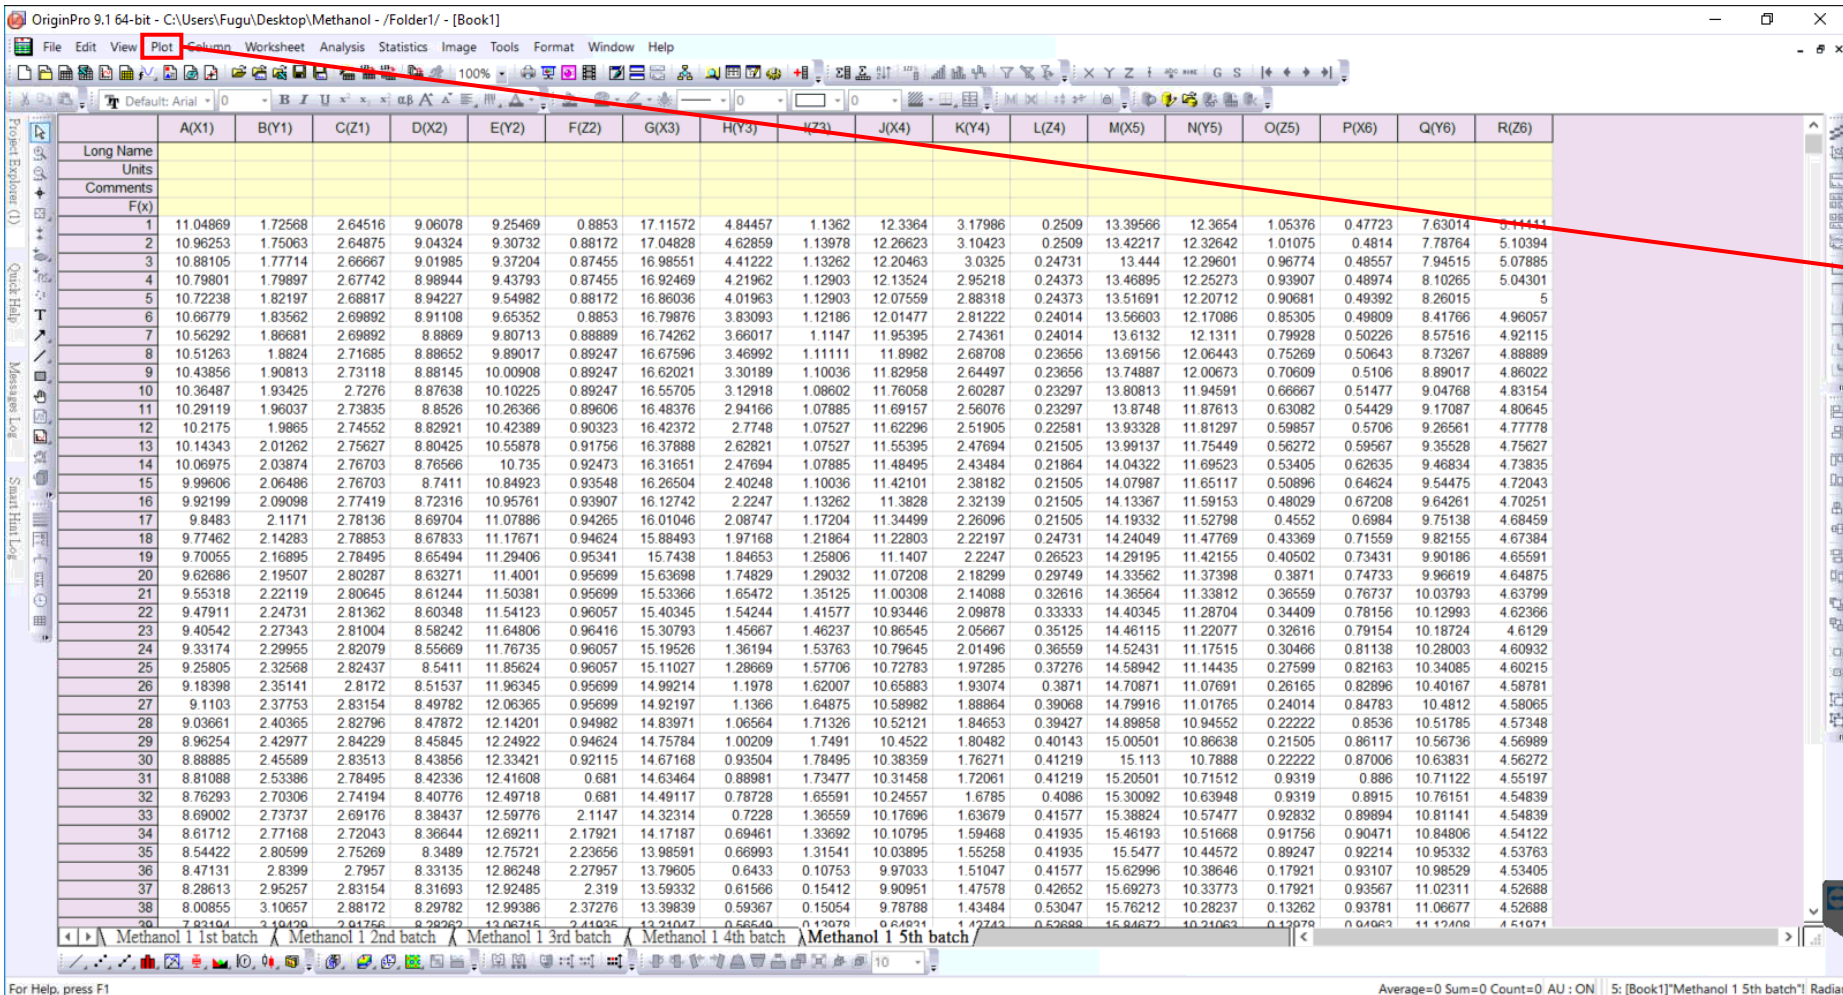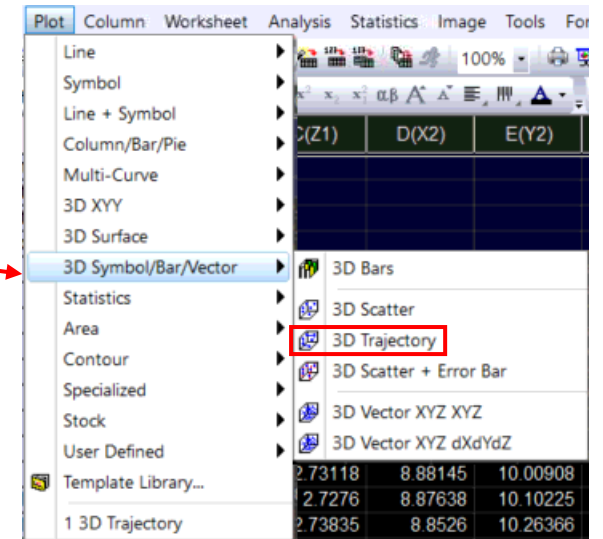

# Plot fish 3D spatial trajectory by Origin 9.1

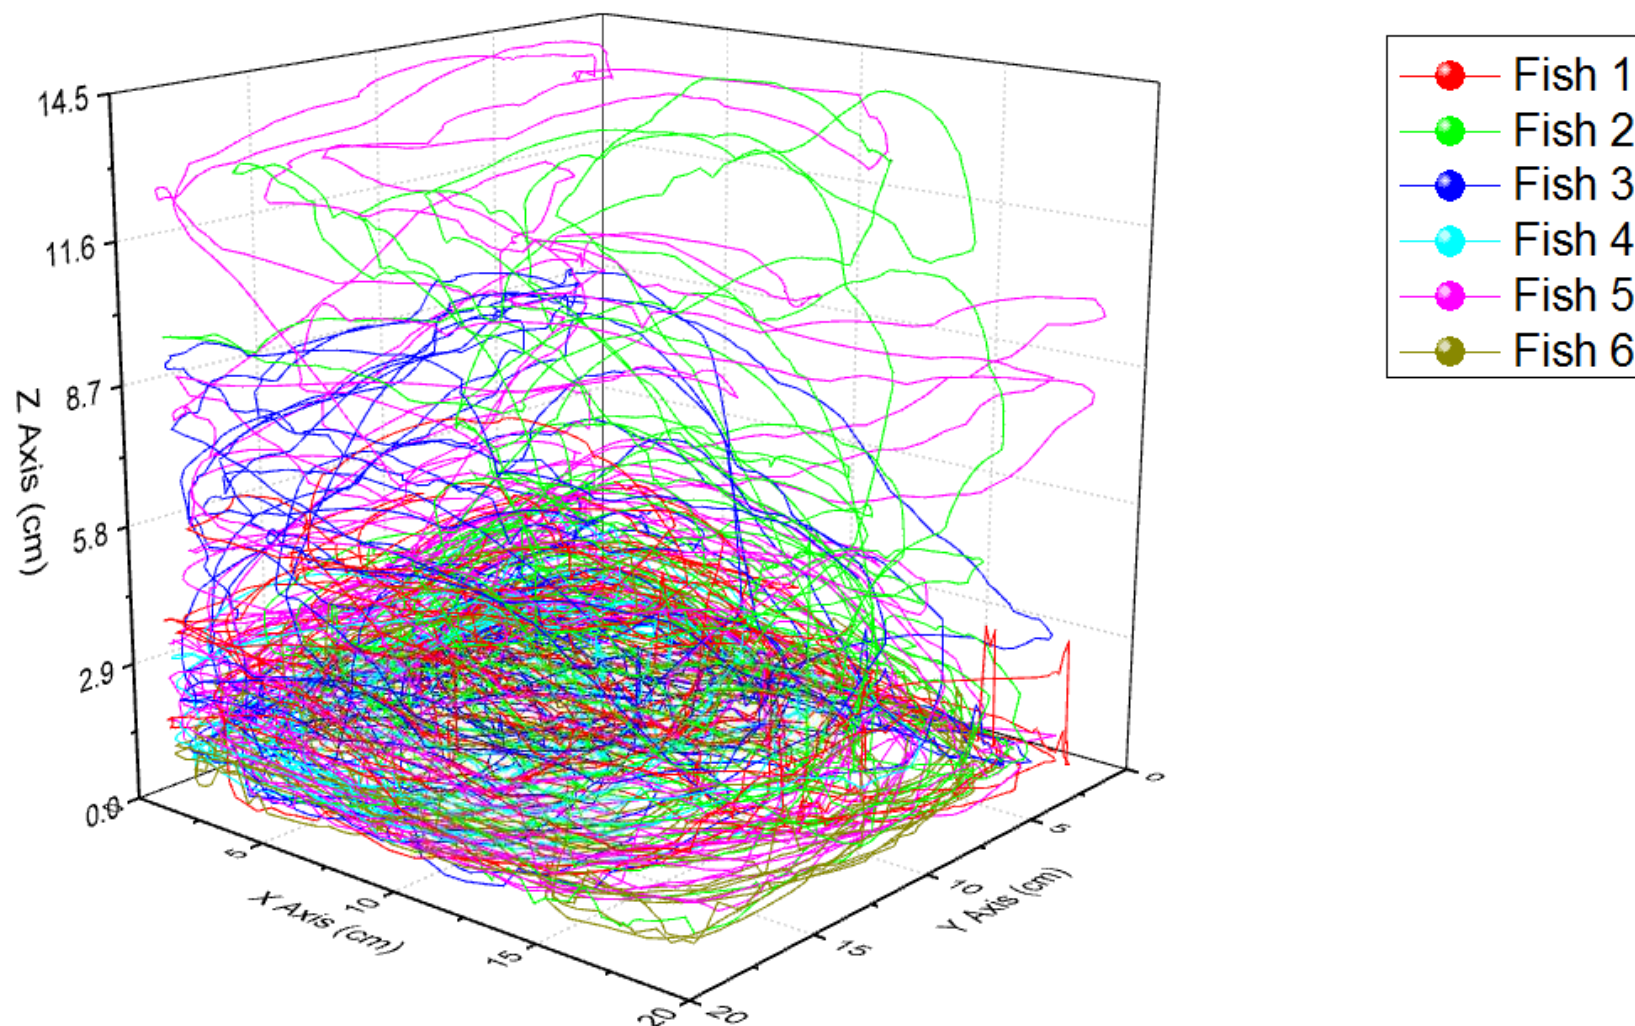



# Plot fish 3D temporal trajectory by Origin 9.1

|    | A       | B       | C               | D        | E      | F        | G       | H      | I      |
|----|---------|---------|-----------------|----------|--------|----------|---------|--------|--------|
| 1  |         |         |                 | Freezing |        | Swimming |         | Rapid  |        |
| 2  | Y1 (cm) | Z5 (cm) | Speed 3D (cm/s) | Y1(cm)   | Z1(cm) | Y1(cm)   | Z1(cm)  | Y1(cm) | Z1(cm) |
| 3  | 12.4255 | 12.9791 | 2.916404055     |          |        | 12.4255  | 12.9791 |        |        |
| 4  | 12.3793 | 12.9762 | 3.524997699     |          |        | 12.3793  | 12.9762 |        |        |
| 5  | 12.324  | 12.9699 | 3.416443925     |          |        | 12.324   | 12.9699 |        |        |
| 6  | 12.274  | 12.9691 | 2.552823399     |          |        | 12.274   | 12.9691 |        |        |
| 7  | 12.237  | 12.9574 | 2.806436078     |          |        | 12.237   | 12.9574 |        |        |
| 8  | 12.1916 | 12.9489 | 3.282763062     |          |        | 12.1916  | 12.9489 |        |        |
| 9  | 12.1389 | 12.9351 | 2.716155436     |          |        | 12.1389  | 12.9351 |        |        |
| 10 | 12.0992 | 12.9298 | 2.969309588     |          |        | 12.0992  | 12.9298 |        |        |
| 11 | 12.0564 | 12.9294 | 2.322362028     |          |        | 12.0564  | 12.9294 |        |        |
| 12 | 12.0229 | 12.9284 | 2.716423592     |          |        | 12.0229  | 12.9284 |        |        |
| 13 | 11.9832 | 12.9262 | 2.436394078     |          |        | 11.9832  | 12.9262 |        |        |
| 14 | 11.9438 | 12.9195 | 1.808948055     |          |        | 11.9438  | 12.9195 |        |        |
| 15 | 11.9167 | 12.916  | 2.977271367     |          |        | 11.9167  | 12.916  |        |        |
| 16 | 11.8683 | 12.9099 | 2.699680083     |          |        | 11.8683  | 12.9099 |        |        |
| 17 | 11.8309 | 12.9106 | 2.844204949     |          |        | 11.8309  | 12.9106 |        |        |
| 18 | 11.7874 | 12.9106 | 1.322584256     |          |        | 11.7874  | 12.9106 |        |        |
| 19 | 11.7687 | 12.9103 | 1.640993189     |          |        | 11.7687  | 12.9103 |        |        |
| 20 | 11.7416 | 12.906  | 2.858128116     |          |        | 11.7416  | 12.906  |        |        |
| 21 | 11.6938 | 12.9028 | 1.963787673     |          |        | 11.6938  | 12.9028 |        |        |
| 22 | 11.6641 | 12.9043 | 2.966916888     |          |        | 11.6641  | 12.9043 |        |        |
| 23 | 11.6171 | 12.9028 | 2.105637973     |          |        | 11.6171  | 12.9028 |        |        |
| 24 | 11.5969 | 12.911  | 1.489766761     |          |        | 11.5969  | 12.911  |        |        |
| 25 | 11.5729 | 12.9099 | 1.624374826     |          |        | 11.5729  | 12.9099 |        |        |
| 26 | 11.5473 | 12.8979 | 2.168018011     |          |        | 11.5473  | 12.8979 |        |        |
| 27 | 11.511  | 12.8908 | 2.010250966     |          |        | 11.511   | 12.8908 |        |        |
| 28 | 11.4797 | 12.8894 | 2.036172178     |          |        | 11.4797  | 12.8894 |        |        |
| 29 | 11.4484 | 12.8915 | 1.78666453      |          |        | 11.4484  | 12.8915 |        |        |
| 30 | 11.4198 | 12.8908 | 3.392642373     |          |        | 11.4198  | 12.8908 |        |        |
| 31 | 11.3671 | 12.8922 | 3.181578052     |          |        | 11.3671  | 12.8922 |        |        |
| 32 | 11.3286 | 12.8968 | 5.240571446     |          |        | 11.3286  | 12.8968 |        |        |

- Temporal Trajectories
- Grouped the average speed (1 fish) for each frame into 3 different types of movement
  - Freezing Time (Speed < 1cm/s)
  - Swimming Time (1cm/s ≤ Speed ≤ 10cm/s)
  - Rapid Movement Time (Speed > 10cm/s)

# Plot fish 3D temporal trajectory by Origin 9.1

- Temporal Trajectories
- Copy the grouped speeds into Origin 9.1 (**Y&Z column**)
- Add the time in the X column
- Make the 3D temporal trajectories

Freezing
Swimming
Rapid Movement

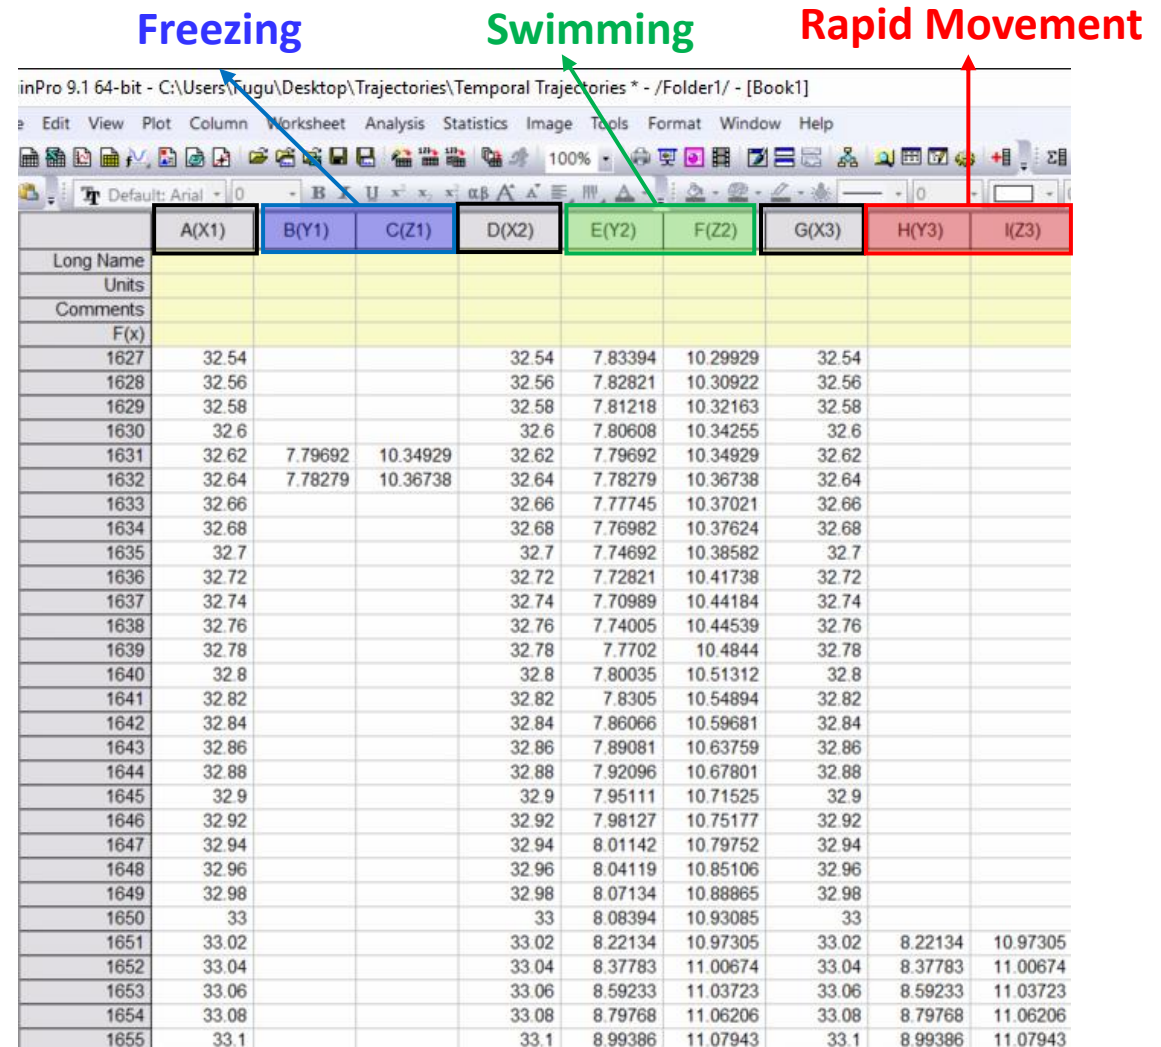

|           | A(X1) | B(Y1)   | C(Z1)    | D(X2) | E(Y2)   | F(Z2)    | G(X3) | H(Y3)   | I(Z3)    |
|-----------|-------|---------|----------|-------|---------|----------|-------|---------|----------|
| Long Name |       |         |          |       |         |          |       |         |          |
| Units     |       |         |          |       |         |          |       |         |          |
| Comments  |       |         |          |       |         |          |       |         |          |
| F(x)      |       |         |          |       |         |          |       |         |          |
| 1627      | 32.54 |         |          | 32.54 | 7.83394 | 10.29929 | 32.54 |         |          |
| 1628      | 32.56 |         |          | 32.56 | 7.82821 | 10.30922 | 32.56 |         |          |
| 1629      | 32.58 |         |          | 32.58 | 7.81218 | 10.32163 | 32.58 |         |          |
| 1630      | 32.6  |         |          | 32.6  | 7.80608 | 10.34255 | 32.6  |         |          |
| 1631      | 32.62 | 7.79692 | 10.34929 | 32.62 | 7.79692 | 10.34929 | 32.62 |         |          |
| 1632      | 32.64 | 7.78279 | 10.36738 | 32.64 | 7.78279 | 10.36738 | 32.64 |         |          |
| 1633      | 32.66 |         |          | 32.66 | 7.77745 | 10.37021 | 32.66 |         |          |
| 1634      | 32.68 |         |          | 32.68 | 7.76982 | 10.37624 | 32.68 |         |          |
| 1635      | 32.7  |         |          | 32.7  | 7.74692 | 10.38582 | 32.7  |         |          |
| 1636      | 32.72 |         |          | 32.72 | 7.72821 | 10.41738 | 32.72 |         |          |
| 1637      | 32.74 |         |          | 32.74 | 7.70989 | 10.44184 | 32.74 |         |          |
| 1638      | 32.76 |         |          | 32.76 | 7.74005 | 10.44539 | 32.76 |         |          |
| 1639      | 32.78 |         |          | 32.78 | 7.7702  | 10.4844  | 32.78 |         |          |
| 1640      | 32.8  |         |          | 32.8  | 7.80035 | 10.51312 | 32.8  |         |          |
| 1641      | 32.82 |         |          | 32.82 | 7.8305  | 10.54894 | 32.82 |         |          |
| 1642      | 32.84 |         |          | 32.84 | 7.86066 | 10.59681 | 32.84 |         |          |
| 1643      | 32.86 |         |          | 32.86 | 7.89081 | 10.63759 | 32.86 |         |          |
| 1644      | 32.88 |         |          | 32.88 | 7.92096 | 10.67801 | 32.88 |         |          |
| 1645      | 32.9  |         |          | 32.9  | 7.95111 | 10.71525 | 32.9  |         |          |
| 1646      | 32.92 |         |          | 32.92 | 7.98127 | 10.75177 | 32.92 |         |          |
| 1647      | 32.94 |         |          | 32.94 | 8.01142 | 10.79752 | 32.94 |         |          |
| 1648      | 32.96 |         |          | 32.96 | 8.04119 | 10.85106 | 32.96 |         |          |
| 1649      | 32.98 |         |          | 32.98 | 8.07134 | 10.88865 | 32.98 |         |          |
| 1650      | 33    |         |          | 33    | 8.08394 | 10.93085 | 33    |         |          |
| 1651      | 33.02 |         |          | 33.02 | 8.22134 | 10.97305 | 33.02 | 8.22134 | 10.97305 |
| 1652      | 33.04 |         |          | 33.04 | 8.37783 | 11.00674 | 33.04 | 8.37783 | 11.00674 |
| 1653      | 33.06 |         |          | 33.06 | 8.59233 | 11.03723 | 33.06 | 8.59233 | 11.03723 |
| 1654      | 33.08 |         |          | 33.08 | 8.79768 | 11.06206 | 33.08 | 8.79768 | 11.06206 |
| 1655      | 33.1  |         |          | 33.1  | 8.99386 | 11.07943 | 33.1  | 8.99386 | 11.07943 |

# Plot fish 3D temporal trajectory by Origin 9.1

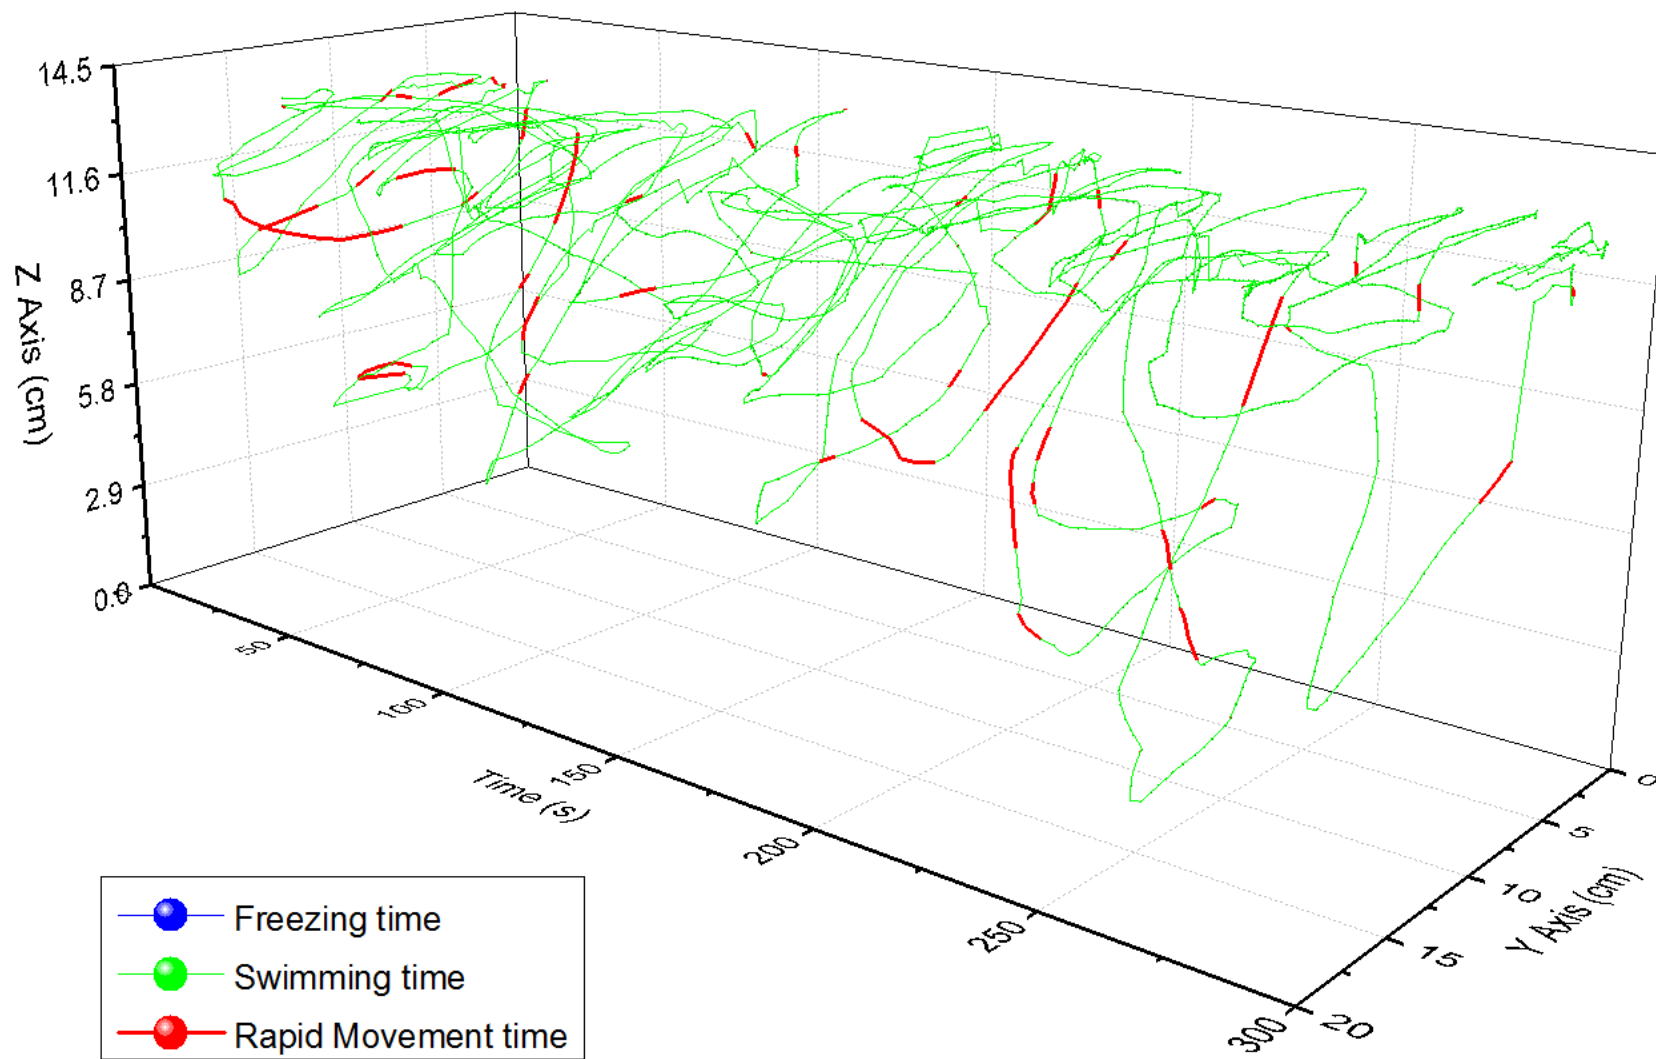

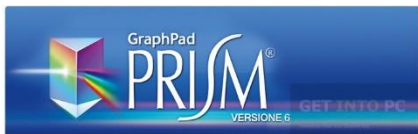

# Perform statistic analysis by GraphPad Prism

## • ANOVA & t-test using GraphPad Prism

GraphPad Prism - [20171109 - Methanol 1% (1st - 5th Try).pzfx:Average Speeds]

File Edit View Insert Change Arrange Window Help

Prism File Sheet Undo Clipboard Analysis Change Import Draw Write Text Export Print Send LA Help

Analyze

Family

- Search results
- Data Tables
  - Average Angular Velocity
  - Average Speeds**
  - Time in Top Duration
  - Total distance
- Info
  - Project info 1
- Results
  - Unpaired t test of Average Speeds
  - Unpaired t test of Average Angular Velocity
  - Unpaired t test of Time in Top Duration
  - Unpaired t test of Total distance
- Graphs
  - Average Speeds
  - Average Angular Velocity
  - Time in Top Duration
  - Total distance
- Layouts

|    | Group A   | Group B     | Group C | Group D | Group E | Group F | Group G | Group H | Group I | Group J | Group K | Group L | Group M | Group N | Group O | Group P | Group Q | Group R | Group S | Group T |
|----|-----------|-------------|---------|---------|---------|---------|---------|---------|---------|---------|---------|---------|---------|---------|---------|---------|---------|---------|---------|---------|
|    | Control   | Methanol 1% | Title   |
| 1  | 5.188284  | 4.720584    |         |         |         |         |         |         |         |         |         |         |         |         |         |         |         |         |         |         |
| 2  | 4.948404  | 5.507437    |         |         |         |         |         |         |         |         |         |         |         |         |         |         |         |         |         |         |
| 3  | 5.582822  | 5.493830    |         |         |         |         |         |         |         |         |         |         |         |         |         |         |         |         |         |         |
| 4  | 5.901224  | 3.888574    |         |         |         |         |         |         |         |         |         |         |         |         |         |         |         |         |         |         |
| 5  | 4.579188  | 7.387308    |         |         |         |         |         |         |         |         |         |         |         |         |         |         |         |         |         |         |
| 6  | 6.818503  | 5.123597    |         |         |         |         |         |         |         |         |         |         |         |         |         |         |         |         |         |         |
| 7  | 7.124488  | 4.058919    |         |         |         |         |         |         |         |         |         |         |         |         |         |         |         |         |         |         |
| 8  | 7.489135  | 6.011557    |         |         |         |         |         |         |         |         |         |         |         |         |         |         |         |         |         |         |
| 9  | 7.375513  | 6.820292    |         |         |         |         |         |         |         |         |         |         |         |         |         |         |         |         |         |         |
| 10 | 8.998168  | 7.043813    |         |         |         |         |         |         |         |         |         |         |         |         |         |         |         |         |         |         |
| 11 | 8.098924  | 7.079899    |         |         |         |         |         |         |         |         |         |         |         |         |         |         |         |         |         |         |
| 12 | 7.482881  | 4.839887    |         |         |         |         |         |         |         |         |         |         |         |         |         |         |         |         |         |         |
| 13 | 5.990220  | 5.348780    |         |         |         |         |         |         |         |         |         |         |         |         |         |         |         |         |         |         |
| 14 | 5.728137  | 4.205941    |         |         |         |         |         |         |         |         |         |         |         |         |         |         |         |         |         |         |
| 15 | 6.410412  | 5.483216    |         |         |         |         |         |         |         |         |         |         |         |         |         |         |         |         |         |         |
| 16 | 6.028707  | 6.501088    |         |         |         |         |         |         |         |         |         |         |         |         |         |         |         |         |         |         |
| 17 | 6.387278  | 5.451345    |         |         |         |         |         |         |         |         |         |         |         |         |         |         |         |         |         |         |
| 18 | 6.091584  | 6.221210    |         |         |         |         |         |         |         |         |         |         |         |         |         |         |         |         |         |         |
| 19 | 5.670586  | 6.742830    |         |         |         |         |         |         |         |         |         |         |         |         |         |         |         |         |         |         |
| 20 | 5.552809  | 6.884981    |         |         |         |         |         |         |         |         |         |         |         |         |         |         |         |         |         |         |
| 21 | 5.494438  | 6.518138    |         |         |         |         |         |         |         |         |         |         |         |         |         |         |         |         |         |         |
| 22 | 7.641838  | 5.934411    |         |         |         |         |         |         |         |         |         |         |         |         |         |         |         |         |         |         |
| 23 | 4.844983  | 4.298153    |         |         |         |         |         |         |         |         |         |         |         |         |         |         |         |         |         |         |
| 24 | 5.393057  | 8.457327    |         |         |         |         |         |         |         |         |         |         |         |         |         |         |         |         |         |         |
| 25 | 5.615047  | 5.852729    |         |         |         |         |         |         |         |         |         |         |         |         |         |         |         |         |         |         |
| 26 | 5.053011  | 6.790129    |         |         |         |         |         |         |         |         |         |         |         |         |         |         |         |         |         |         |
| 27 | 6.298574  | 8.008808    |         |         |         |         |         |         |         |         |         |         |         |         |         |         |         |         |         |         |
| 28 | 5.727835  | 5.498518    |         |         |         |         |         |         |         |         |         |         |         |         |         |         |         |         |         |         |
| 29 | 5.237028  | 7.254458    |         |         |         |         |         |         |         |         |         |         |         |         |         |         |         |         |         |         |
| 30 | 6.543345  | 4.472220    |         |         |         |         |         |         |         |         |         |         |         |         |         |         |         |         |         |         |
| 31 | 5.628514  |             |         |         |         |         |         |         |         |         |         |         |         |         |         |         |         |         |         |         |
| 32 | 6.718527  |             |         |         |         |         |         |         |         |         |         |         |         |         |         |         |         |         |         |         |
| 33 | 10.289940 |             |         |         |         |         |         |         |         |         |         |         |         |         |         |         |         |         |         |         |
| 34 | 8.829572  |             |         |         |         |         |         |         |         |         |         |         |         |         |         |         |         |         |         |         |
| 35 | 9.993091  |             |         |         |         |         |         |         |         |         |         |         |         |         |         |         |         |         |         |         |
| 36 | 8.928714  |             |         |         |         |         |         |         |         |         |         |         |         |         |         |         |         |         |         |         |

Analyze Data

Built-in analysis

Which analysis?

- Transform, Normalize...
  - Transform
  - Normalize
  - Prune rows
  - Remove baseline and column math
  - Transpose X and Y
  - Fraction of total
- XY analyses
- Column analyses
  - t tests (and nonparametric tests)**
  - One-way ANOVA (and nonparametric)**
  - Column statistics
  - Frequency distribution
  - ROC Curve
  - Bland-Altman method comparison
  - Correlation
  - Identify outliers
- Grouped analyses
- Contingency table analyses
- Survival analyses
- Parts of whole analyses
- Generate curve

Analyze which data sets?

- ☒ A: Control
- ☒ B: Methanol 1%

Select All Deselect All

Help Cancel OK



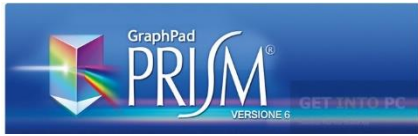

# Perform statistic analysis by GraphPad Prism

GraphPad Prism - [20171109 - Methanol 1% (1st - 5th Try).pzfx:Unpaired t test of Average Speeds]

File Edit View Insert Change Arrange Window Help

Prism File Sheet Undo Clipboard Analysis Interpret Change Draw Write Text Export Print Send LA Help

Family  
Search results  
Data Tables  
Average Angular Velocity  
**Average Speeds**  
Time in Top Duration  
Total distance  
Info  
Project info 1  
Results  
Unpaired t test of Average Speeds  
Unpaired t test of Average Angular Velocity  
Unpaired t test of Time in Top Duration  
Unpaired t test of Total distance  
Graphs  
Average Speeds  
Average Angular Velocity  
Time in Top Duration  
Total distance  
Layouts

**t test**

|    |                                     |                         |
|----|-------------------------------------|-------------------------|
| 1  | Table Analyzed                      | Average Speeds          |
| 2  |                                     |                         |
| 3  | Column B                            | Methanol 1%             |
| 4  | vs.                                 | vs.                     |
| 5  | Column A                            | Control                 |
| 6  |                                     |                         |
| 7  | Unpaired t test                     |                         |
| 8  | P value                             | < 0.0001                |
| 9  | P value summary                     | ****                    |
| 10 | Significantly different? (P < 0.05) | Yes                     |
| 11 | One- or two-tailed P value?         | Two-tailed              |
| 12 | t, df                               | t=4.433 df=88           |
| 13 |                                     |                         |
| 14 | How big is the difference?          |                         |
| 15 | Mean $\pm$ SEM of column A          | 7.357 $\pm$ 0.2124 N=80 |
| 16 | Mean $\pm$ SEM of column B          | 5.857 $\pm$ 0.2190 N=30 |
| 17 | Difference between means            | -1.500 $\pm$ 0.3383     |
| 18 | 95% confidence interval             | -2.172 to -0.8273       |
| 19 | R square                            | 0.1825                  |
| 20 |                                     |                         |
| 21 | F test to compare variances         |                         |
| 22 | F, DFn, Dfd                         | 1.881, 59, 29           |
| 23 | P value                             | 0.0655                  |
| 24 | P value summary                     | ns                      |
| 25 | Significantly different? (P < 0.05) | No                      |
| 26 |                                     |                         |
| 27 |                                     |                         |
| 28 |                                     |                         |
| 29 |                                     |                         |
| 30 |                                     |                         |
| 31 |                                     |                         |
| 32 |                                     |                         |
| 33 |                                     |                         |
| 34 |                                     |                         |
| 35 |                                     |                         |
| 36 |                                     |                         |

Unpaired t test of Average Speeds Tabular results



# Perform statistic analysis by GraphPad Prism

GraphPad Prism - (20171109 - Methanol 1% (1st - 5th Try).pzfx:Average Speeds)

File Edit View **Insert** Change Arrange Window Help

Prism File Sheet Undo Clipboard Analysis Change Import Draw Write Text Export Print Send LA Help

Family  
Search results  
Data Tables  
Average Angular Velocity  
**Average Speeds**  
Time in Top Duration  
Total distance  
Info  
Project info 1  
Results  
Unpaired t test of Average Speeds  
Unpaired t test of Average Angular Velocity  
Unpaired t test of Time in Top Duration  
Unpaired t test of Total distance  
Graphs  
Average Speeds  
Average Angular Velocity  
Time in Top Duration  
Total distance  
Layouts

|    | Group A   | Group B     | Group C | Group D | Group E | Group F | Group G | Group H | Group I | Group J | Group K | Group L | Group M | Group N | Group O | Group P | Group Q | Group R | Group S | Group T |
|----|-----------|-------------|---------|---------|---------|---------|---------|---------|---------|---------|---------|---------|---------|---------|---------|---------|---------|---------|---------|---------|
|    | Control   | Methanol 1% | Title   |
| 1  | 5.188284  | 4.720564    |         |         |         |         |         |         |         |         |         |         |         |         |         |         |         |         |         |         |
| 2  | 4.948404  | 5.507437    |         |         |         |         |         |         |         |         |         |         |         |         |         |         |         |         |         |         |
| 3  | 5.562822  | 5.493630    |         |         |         |         |         |         |         |         |         |         |         |         |         |         |         |         |         |         |
| 4  | 5.901224  | 3.886574    |         |         |         |         |         |         |         |         |         |         |         |         |         |         |         |         |         |         |
| 5  | 4.579186  | 7.387306    |         |         |         |         |         |         |         |         |         |         |         |         |         |         |         |         |         |         |
| 6  | 6.818503  | 5.123597    |         |         |         |         |         |         |         |         |         |         |         |         |         |         |         |         |         |         |
| 7  | 7.124486  | 4.050919    |         |         |         |         |         |         |         |         |         |         |         |         |         |         |         |         |         |         |
| 8  | 7.469135  | 6.011557    |         |         |         |         |         |         |         |         |         |         |         |         |         |         |         |         |         |         |
| 9  | 7.375513  | 6.820292    |         |         |         |         |         |         |         |         |         |         |         |         |         |         |         |         |         |         |
| 10 | 8.996168  | 7.043613    |         |         |         |         |         |         |         |         |         |         |         |         |         |         |         |         |         |         |
| 11 | 8.098924  | 7.079899    |         |         |         |         |         |         |         |         |         |         |         |         |         |         |         |         |         |         |
| 12 | 7.462861  | 4.839987    |         |         |         |         |         |         |         |         |         |         |         |         |         |         |         |         |         |         |
| 13 | 5.990220  | 5.348780    |         |         |         |         |         |         |         |         |         |         |         |         |         |         |         |         |         |         |
| 14 | 5.728137  | 4.205941    |         |         |         |         |         |         |         |         |         |         |         |         |         |         |         |         |         |         |
| 15 | 6.410412  | 5.493216    |         |         |         |         |         |         |         |         |         |         |         |         |         |         |         |         |         |         |
| 16 | 6.028707  | 6.561006    |         |         |         |         |         |         |         |         |         |         |         |         |         |         |         |         |         |         |
| 17 | 6.367279  | 5.451345    |         |         |         |         |         |         |         |         |         |         |         |         |         |         |         |         |         |         |
| 18 | 6.091584  | 6.221210    |         |         |         |         |         |         |         |         |         |         |         |         |         |         |         |         |         |         |
| 19 | 5.670596  | 6.742630    |         |         |         |         |         |         |         |         |         |         |         |         |         |         |         |         |         |         |
| 20 | 5.552809  | 4.664961    |         |         |         |         |         |         |         |         |         |         |         |         |         |         |         |         |         |         |
| 21 | 5.494436  | 6.516138    |         |         |         |         |         |         |         |         |         |         |         |         |         |         |         |         |         |         |
| 22 | 7.841638  | 5.934411    |         |         |         |         |         |         |         |         |         |         |         |         |         |         |         |         |         |         |
| 23 | 4.844993  | 4.296153    |         |         |         |         |         |         |         |         |         |         |         |         |         |         |         |         |         |         |
| 24 | 5.393057  | 8.457327    |         |         |         |         |         |         |         |         |         |         |         |         |         |         |         |         |         |         |
| 25 | 5.615047  | 5.852729    |         |         |         |         |         |         |         |         |         |         |         |         |         |         |         |         |         |         |
| 26 | 5.053011  | 6.790129    |         |         |         |         |         |         |         |         |         |         |         |         |         |         |         |         |         |         |
| 27 | 6.296574  | 8.008808    |         |         |         |         |         |         |         |         |         |         |         |         |         |         |         |         |         |         |
| 28 | 5.727835  | 5.499516    |         |         |         |         |         |         |         |         |         |         |         |         |         |         |         |         |         |         |
| 29 | 5.237026  | 7.254458    |         |         |         |         |         |         |         |         |         |         |         |         |         |         |         |         |         |         |
| 30 | 6.543345  | 4.472220    |         |         |         |         |         |         |         |         |         |         |         |         |         |         |         |         |         |         |
| 31 | 5.628514  |             |         |         |         |         |         |         |         |         |         |         |         |         |         |         |         |         |         |         |
| 32 | 8.718527  |             |         |         |         |         |         |         |         |         |         |         |         |         |         |         |         |         |         |         |
| 33 | 10.289940 |             |         |         |         |         |         |         |         |         |         |         |         |         |         |         |         |         |         |         |
| 34 | 8.629672  |             |         |         |         |         |         |         |         |         |         |         |         |         |         |         |         |         |         |         |
| 35 | 9.993091  |             |         |         |         |         |         |         |         |         |         |         |         |         |         |         |         |         |         |         |
| 36 | 8.928714  |             |         |         |         |         |         |         |         |         |         |         |         |         |         |         |         |         |         |         |

Average Speeds Row 54, Column W

- New Data Table (+ Graph)...
- New Info...
- New Analysis...
- New Graph of Existing Data...**
- New Layout...

---

- Duplicate Current Sheet
- Duplicate Family...

---

- Rows/Columns...
- Create Series...

---

- Insert Object >
- Embedded Table...
- Character >
- Info or Analysis Constant...
- Insert Prism Graph...
- New Floating Note >
- Audio Note...

---

- Import Data...



# Perform statistic analysis by GraphPad Prism

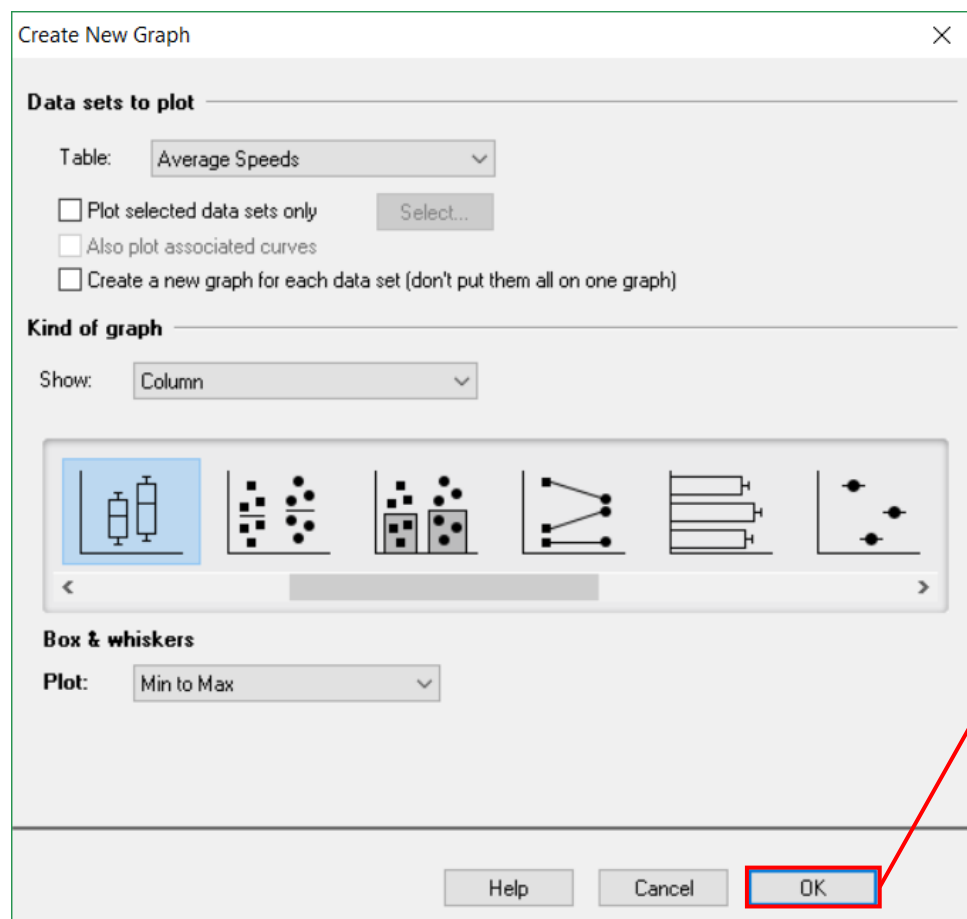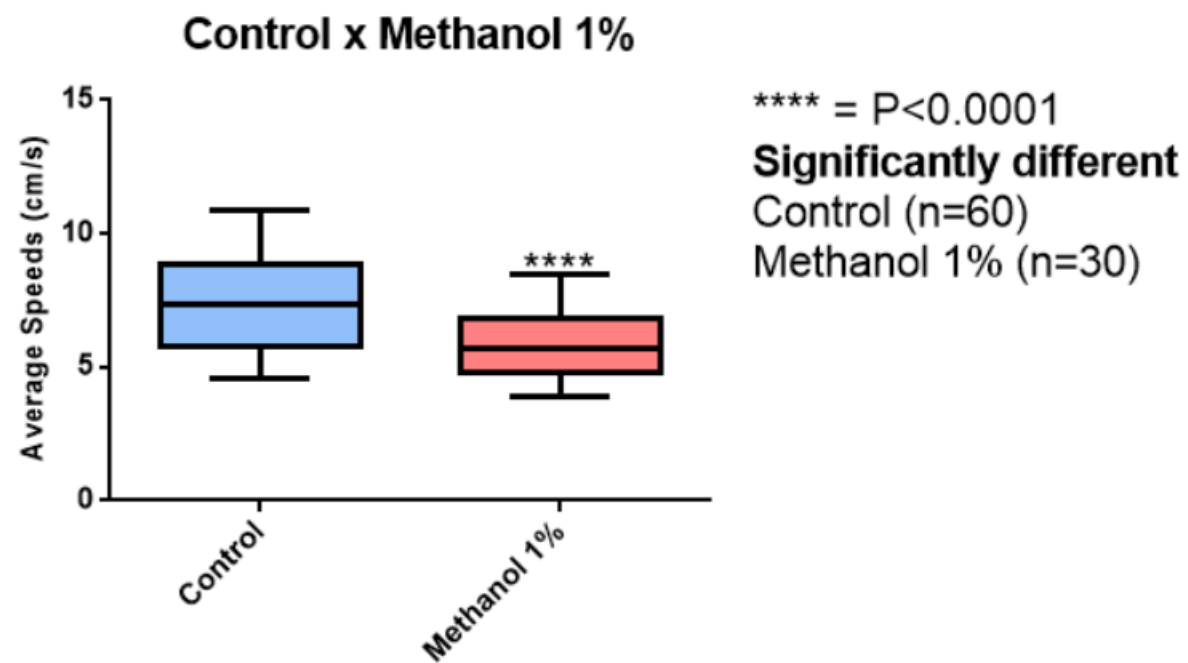

Supplement: s1 [file s1]
