# Supplementary material
Source: MDPI journal article supplement (https://www.mdpi.com/2411-5134/3/1/11)
Supplement: s1 [file s1]

**Table S1. Endpoint behaviors tested in this study.**

| Endpoint (units)                             | Definition                                                                                                                                                     | Interpretation                                                                                                          |
|----------------------------------------------|----------------------------------------------------------------------------------------------------------------------------------------------------------------|-------------------------------------------------------------------------------------------------------------------------|
| Total distance traveled (cm)                 | Total distance the zebrafish traveled within the novel tank<br>$\Sigma \sqrt{(X_2-X_1)^2+(Y_2-Y_1)^2+(Z_2-Z_1)^2}$                                             | Reflects general motor/ neurological phenotypes.                                                                        |
| Average swimming speed (cm s <sup>-1</sup> ) | $\left( \frac{\text{Total distance (cm)}}{\text{Total time (s)}} \right)$                                                                                      | Reflects motor aspects of zebrafish swimming, may be increased or decreased depending on the nature of behavioral test. |
| Maximum speed (cm s <sup>-1</sup> )          | Maximum speed fish capable to reach                                                                                                                            |                                                                                                                         |
| Minimum speed (cm s <sup>-1</sup> )          | Minimum speed fish capable to reach                                                                                                                            |                                                                                                                         |
| Freezing time (s)                            | Total time when speed less than 1 cm s <sup>-1</sup>                                                                                                           |                                                                                                                         |
| Swimming time (s)                            | Total time when speed 1-10 cm s <sup>-1</sup>                                                                                                                  | Indicates increased anxiety and freezing time is generally higher in stressed zebrafish.                                |
| Rapid movement time (s)                      | Total time when speed more than 10 cm s <sup>-1</sup>                                                                                                          |                                                                                                                         |
| Turning angle (°)                            | Total turning angle in 1 frame<br>$\left( \frac{1}{\left( \tan\left( \frac{\Delta Y}{\Delta X} \right) \times 180 \right) \times \pi^1} \right)$               |                                                                                                                         |
| Angular velocity (° ms <sup>-1</sup> )       | Magnitude and direction of zebrafish angular speed<br>$\frac{(\text{Turning angle} \times \text{frame rate})}{1000}$                                           |                                                                                                                         |
| Absolute turn angle                          | Total turning angles without considering the sign of angular direction                                                                                         | Reflects motor aspects of zebrafish swimming, may be increased or decreased depending on the nature of behavioral test. |
| Fast type latent time (s)                    | Total time when Angular velocity above 0.5° ms <sup>-1</sup>                                                                                                   |                                                                                                                         |
| Slow type latent time (s)                    | Total time when Angular velocity below 0.5° ms <sup>-1</sup>                                                                                                   |                                                                                                                         |
| Meandering (° m <sup>-1</sup> )              | Movement without a fixed direction or path (zig-zag movement)<br>$\left( \frac{\text{Absolute turn angle (°)}}{\text{Total distance (cm)}} \times 100 \right)$ |                                                                                                                         |
| Time spent in the top (%)                    | Total time spent in the top portion of the novel tank                                                                                                          | More top entries indicates lower anxiety level.                                                                         |
| Time spent in the bottom (%)                 | Total time spent in the bottom portion of the novel tank                                                                                                       | More bottom entries indicates higher anxiety level.                                                                     |

Table S2. Statistical analysis of locomotion in 2% ethanol-treated adult zebrafish based on 3D swimming assay.

|                               |        | Distance and Speed  |                                     | Absolute Turn Angle (°) | Average Angular Velocity (° s <sup>-1</sup> ) | Meandering (° m <sup>-1</sup> ) | Movement Time Ratios    |                         |                               | Time in Top Ratio (%) | Time in Bottom Ratio (%) |
|-------------------------------|--------|---------------------|-------------------------------------|-------------------------|-----------------------------------------------|---------------------------------|-------------------------|-------------------------|-------------------------------|-----------------------|--------------------------|
|                               |        | Total distance (cm) | Average speed (cm s <sup>-1</sup> ) |                         |                                               |                                 | Freezing Time Ratio (%) | Swimming Time Ratio (%) | Rapid movement time ratio (%) |                       |                          |
| <b>Wild Type</b><br>(Control) | Fish 1 | 1556.4              | 5.2                                 | 1288.4                  | 4.3                                           | 82.78                           | 1%                      | 95%                     | 4%                            | 91%                   | 9%                       |
|                               | Fish 2 | 1483.8              | 4.9                                 | 1536.3                  | 5.1                                           | 103.54                          | 1%                      | 95%                     | 4%                            | 74%                   | 26%                      |
|                               | Fish 3 | 1668.7              | 5.6                                 | 1371.0                  | 4.6                                           | 82.16                           | 1%                      | 93%                     | 6%                            | 70%                   | 30%                      |
|                               | Fish 4 | 1770.2              | 5.9                                 | 1486.3                  | 5.0                                           | 83.96                           | 1%                      | 90%                     | 9%                            | 72%                   | 28%                      |
|                               | Fish 5 | 1373.7              | 4.6                                 | 1829.1                  | 6.1                                           | 133.15                          | 2%                      | 94%                     | 4%                            | 52%                   | 48%                      |
|                               | Fish 6 | 2045.4              | 6.8                                 | 1658.2                  | 5.5                                           | 81.07                           | 1%                      | 85%                     | 14%                           | 76%                   | 24%                      |
| <b>Wild Type + EtOH 2%</b>    | Fish 1 | 2280.6              | 7.6                                 | 1684.8                  | 5.6                                           | 73.87                           | 1%                      | 82%                     | 17%                           | 3%                    | 97%                      |
|                               | Fish 2 | 2597.7              | 8.7                                 | 1369.4                  | 4.6                                           | 52.72                           | 1%                      | 79%                     | 21%                           | 3%                    | 97%                      |
|                               | Fish 3 | 2802.9              | 9.3                                 | 2076.7                  | 6.9                                           | 74.09                           | 1%                      | 77%                     | 22%                           | 4%                    | 96%                      |
|                               | Fish 4 | 2620.4              | 8.7                                 | 4608.6                  | 5.7                                           | 65.45                           | 0%                      | 79%                     | 20%                           | 5%                    | 95%                      |
|                               | Fish 5 | 2690.3              | 9.0                                 | 2342.0                  | 7.8                                           | 87.06                           | 0%                      | 79%                     | 21%                           | 1%                    | 99%                      |
|                               | Fish 6 | 2402.1              | 8.0                                 | 1493.4                  | 5.0                                           | 62.18                           | 1%                      | 81%                     | 18%                           | 2%                    | 98%                      |

**Table S3. Comparison of different methods to measure zebrafish behavior**

|                              | Require more than 1 camera? | Major software platform to run movement tracking | Require special script to run software? | Is able to track multiple objects ? |
|------------------------------|-----------------------------|--------------------------------------------------|-----------------------------------------|-------------------------------------|
| This study                   | No                          | idTracker                                        | No                                      | Yes                                 |
| Zhu and Weng (2007)          | No                          | C#                                               | Yes (Custom Made Tracking System)       | Yes                                 |
| Cachat and colleagues (2011) | Yes                         | EthoVision XT7                                   | No                                      | Not reported in original article    |
| Ladu and colleagues (2015)   | Yes                         | MATLAB                                           | Yes (Custom Made Tracking System)       | Not reported in original article    |
| Li and colleagues (2016)     | Yes                         | MATLAB                                           | Yes (Custom Made Tracking System)       | Not reported in original article    |
| Macri and colleagues (2017)  | Yes                         | MATLAB                                           | Yes (Custom Made Tracking System)       | Not reported in original article    |
| Mwaffo and colleagues (2017) | Yes                         | MATLAB                                           | Yes (Custom Made Tracking System)       | Not reported in original article    |
