# Supplementary material
Source: MDPI journal article supplement (https://www.mdpi.com/2411-5134/3/1/11)
Supplement: s1 [file s1]

Archive with 5 entries (5 files):
- 180128_Suppl protocol_ 3D Fish Movement Tracking using idTracker.pdf
- suppl tables.pdf
- Video S1_WT 3D swimming_10x speed.mp4
- Video S2_2% EtOH 3D swimming_10x speed.mp4
- Video S3_six juvenile fish @ 1cm BL_10x speed.mp4
